# Supplementary material for: Functionally active modulators targeting the LRRK2 WD40 repeat domain identified by FRASE-bot in CACHE Challenge #1
Source: Royal Society of Chemistry journal article supplement (doi:10.1039/d4sc07532c), 2025-01-01
Supplement: d4sc07532c1.xlsx [file d4sc07532c1.xlsx]

## Sheet: t_1183
smiles	cid	participant	RU_ratio_50uM	RU_ratio_100uM	does_not_pass_visual_inspection	LRRK2_SPR_KD_uM	LRRK2_SPR_pcent_binding	LRRK2_SPR_comment	NSD2_SPR_KD_uM	NSD2_SPR_pcent_binding	8KSPR_nsd2_comment	LRRK2_BLI_KD_uM	19F_NMR	ITC	hit_candidate
CC1=NOC=2N=C(C=C(C(=O)NC=3C=CC=C(CN4N=C5C=CC=CN5C4=O)C3)C12)C=6C=CC(C)=CC6	CACHE_1183_1	1183	0.2	0.331
NC(=O)C=1C=C(NC(=O)C=2C=C(N=C3C=CC=CC23)C=4C=CC=CC4)C=C(C1)C(=O)N	CACHE_1183_10	1183	1.3	1.42
CC=1C=CC(=C(F)C1)N2N=C(C(=O)NC=3C=CC=CC3N4N=CC=5C(=O)NC=NC45)C=6CCCC62	CACHE_1183_11	1183	0.1	0.0857
CC1=CC=C(O1)C=2C=C(C(=O)NC=3C=CC=C(C3)C(=O)NCCC(=O)N)C=4C=CC=CC4N2	CACHE_1183_12	1183	-0.5	-0.588
C[C@H](NC(=O)C1=CC(CC=2C=CC=CC2)=NN1)C(=O)NCCC=3C=CC=CC3	CACHE_1183_13	1183	0.4	0.908
O=C(NC=1C=CC=C(C1)C2=NN=CN2)C=3C=C(N=C4C=CC=CC34)C=5C=CC=CC5	CACHE_1183_14	1183	0.1	0.289
CC=1C=CC(=CC1NC(=O)C=2C=CC(=O)N(C2)C=3C=CC=C(Cl)C3)C4=NN=CO4	CACHE_1183_15	1183	0.5	1.1
COC=1C=CC=2N=C(NC(=O)NCC=3C=C(ON3)C=4C=CC=5C=CC=CC5C4)SC2N1	CACHE_1183_16	1183	0	0.0919
CC=1C=C(C=CC1F)C2=NOC(CNC3(CC=4C=CC(F)=CC4)CCOCC3)=N2	CACHE_1183_17	1183	0.1	-0.0275
NS(=O)(=O)C1=CC=C(CNC(=O)C=2C=CC3=NOC(C=4C=CC(F)=CC4)=C3C2)S1	CACHE_1183_18	1183	0.1	0.329
FC=1C=CC(=CC1)C(=O)NC=2C=CC=C3N(CCCC23)S(=O)(=O)C=4C=CC=5NC(=O)NC(=O)C5C4	CACHE_1183_19	1183	0	0.095
CN(CC(=O)N)C(=O)C=1C=CC=C(NC(=O)C=2C=C(N=C3C=CC(C)=CC23)C4=CC=CS4)C1	CACHE_1183_2	1183	0.9	0.941		32	68		42	43		>200			yes
CC=1N=C(NCC=2C=CC=C(OCC(=O)N)C2)C=3C=NN(C=4C=CC=C(F)C4)C3N1	CACHE_1183_20	1183	0.1	0.19
CC=1C=CC(=CC1)C2=CN=C(CCC(=O)NC=3C=C(NN3)C4CCCCC4)O2	CACHE_1183_21	1183	0	0.093
OC[C@@H](NC(=O)C1=CC=C(CN2C=C(N=N2)C=3C=CC=4C=NC=CC4C3)O1)C=5C=CC=CC5	CACHE_1183_22	1183	1	1.82		82	223		106	139
O=C(NC=1C=CC(=CC1)S(=O)(=O)NC2CC2)C=3C=C(N=C4C=CC=CC34)C=5C=CC=CC5	CACHE_1183_23	1183	0	0.0584
FC1(F)CC(C1)NC(=O)C2=NSC=3C=C(NC4=NNC=5C=CC=NC45)C=CC23	CACHE_1183_24	1183	0.1	0.193
O=C(NC=1C=CC=C2NC=NC12)C=3C=C(N=C4N(CC=5C=CC=NC5)N=CC34)C=6C=CC=CC6	CACHE_1183_25	1183	0.4	0.73		16	79		-	49	low binding	9.6 poor sol.			yes
CC(=O)N1CCC=2C=C(NC(=O)C=3C=C(N=C4C=CC=CC34)C5=CC=C(C)O5)C=CC12	CACHE_1183_26	1183	0.1	0.192
O=C(N1CCCC2=NNC=C12)C=3C=CC(CNS(=O)(=O)C=4C=CC=5C=CC=CC5C4)=CC3	CACHE_1183_27	1183	0.3	0.492
NC(=O)NC=1C=CC=C(CNC(=O)C=2C=CC3=NN=C(C=4C=CC=CC4)N3C2)C1	CACHE_1183_28	1183	0.3	0.262
CC1=C(C=NN1C=2C=CC(=O)NN2)C(=O)NC=3C=CC=C(NC(=O)C=4C=CC=C(C4)C(F)(F)F)C3	CACHE_1183_29	1183	0	-0.614
CCCCN1C(=O)NC(=O)C=2C=C(C=NC12)C(=O)NC=3C=CC=4NC(CC=5C=CC(F)=CC5)=NC4C3	CACHE_1183_3	1183	0.2	0.23
NC(=O)C=1C=CC=C(OC=2C=CC(NC(=O)C=3C=CC=C(NC(=O)C4=CC(=O)NC=5C=CC=CC45)C3)=CC2)C1	CACHE_1183_30	1183	0.4	0.604	+
CC(C)(N)C=1C=C(NN1)C(=O)NCC=2C=CC(=CC2)C=3C=CC=4OCCC4C3	CACHE_1183_31	1183	2	5.32		Linear	728
CC1=CC(NC(=O)NCC=2C=CC(=CC2)C3=CC=NN3)=NN1C=4C=CC=C(F)C4	CACHE_1183_32	1183	0.1	0.21
O=C(NCC=1C=CC(=CC1)C2=CC=NN2)NC=3C=NN(CC=4C=CC=CN4)C3	CACHE_1183_33	1183	-0.2	-0.0816
O=C(NCC=1C=CC=2CN(CC2C1)C(=O)C=3NN=C4CCCCC34)C=5NN=C6CCCCC56	CACHE_1183_34	1183	-0.2	-2.97
O=C(NC=1C=CC=C(C1)C(=O)NC=2C=CC=CN2)C=3C=CC(NC4=NS(=O)(=O)C=5C=CC=CC45)=CC3	CACHE_1183_35	1183	0.1	0.0831
OCC1=CN(CC=2C=CC(=CC2)C(=O)N3CC=C(C3)C=4C=CC=CC4F)N=N1	CACHE_1183_36	1183	0.8	1.67
NC(=O)NC=1C=C(NC(=O)C=2C=CC(=CC2)S(=O)(=O)NC=3C=CC=C(C3)C(F)(F)F)C=CC1F	CACHE_1183_37	1183	0	0.0968
CC1=NN=NN1C=2C=C(NC(=O)C=3C=C(N=C4C=CC=CC34)C=5C=CC=CC5)C=CC2F	CACHE_1183_4	1183	0.1	0.194
COC=1C=CC(NC(=O)C2=CN=C(S2)C=3C=NC=CN3)=CC1OCC=4C=CC=5C=CC=CC5N4	CACHE_1183_5	1183	0.1	0.116
CCNC(=O)NCC=1C=CC(NC(=O)C=2C=C(N=C3C=CC=CC23)C=4C=CC=CC4)=CC1	CACHE_1183_6	1183	0.1	0.0977
O=C1NC(=O)C=2C=C(C=NC2N1C3CC3)C4=NC(=NO4)C=5C=CC(CN6C=NC=7C=CC=CC67)=CC5	CACHE_1183_7	1183	0.1	0.109
CC1=NOC=2N=C(C=C(C(=O)NC=3C=CC=4CC(=O)NC4C3)C12)C=5C=CC=C(C5)C(F)(F)F	CACHE_1183_8	1183	0	0.126
CC=1C=CC(=CC1C)C2=NN(CCC#N)C=C2C(=O)NC=3C=CC(F)=C(C3)C(=O)N	CACHE_1183_9	1183	0.2	0.553
