# Supplementary material for: Functionally active modulators targeting the LRRK2 WD40 repeat domain identified by FRASE-bot in CACHE Challenge #1
Source: Royal Society of Chemistry journal article supplement (doi:10.1039/d4sc07532c), 2025-01-01
Supplement: d4sc07532c2.xlsx [file d4sc07532c2.xlsx]

## Sheet: Sheet0
	COMPOUNDS				ASSAY					PROTEIN IMMOBILIZATION								PRIMARY SCREENING [SINGLE CONCENTRATION]								DOSE RESPONSE [STEADY STATE AFFINITY METHOD]																	ASSAY		THERMAL STABILIZATION
Participant	CACHE ID	Smiles	Stereochemistry		﻿﻿Assay Type	Instrument	SPR Chip Type	Buffer	HTS stage	Target ID	Temperature (℃)	Flow rate (μl/min)	Contact time (s)	Dissociation time (s)	Protein Immobilization Conditions	Immobilized Protein Level (RU)	Immobilized Protein MW	compound concentration (μM)	Adjusted relative Run 1	Adjusted relative Run 2	Cut-off	Slope	Slow dissociation	R > Rmax	QC - Binding to reference	Min concentration (μM)	Max concentration (μM)	KD (M)	curated KD M	T(KD)	Rmax (RU)	curated Rmax RU	curation comment	T(Rmax)	offset (RU)	T(offset)	Affinity Chi2 (RU2)	% Binding	curated % Binding	Theoretical Rmax (RU)	Experiment Date		Assay type	Buffer	dT 100uM	dT 200uM	dT 500uM	dT comment
1183	CACHE_1183_1	Cc1ccc(cc1)c1cc(C(Nc2cccc(CN3C(N4C=CC=CC4=N3)=O)c2)=O)c2c(C)noc2n1	Achiral|None|		SPR	Biacore 8K	SA	10mM HEPES pH 7.5, 150mM NaCl, 0.01% Tween 20, 2% DMSO	primary screen	LRRK2	25	30	30	15	3 injections of 50 mM NaOH for 60 sec each at 10 µL/min flow rate; 1 injection of protein for 50 sec at 10 µL/min flow rate to reach 7200-7400 RU; 1 injection of assay buffer without DMSO at 30 µL/min flow rate.	7336.49	47300	50	0.21		Below	No	No	No	1.08																2022-08-05
1183	CACHE_1183_1	Cc1ccc(cc1)c1cc(C(Nc2cccc(CN3C(N4C=CC=CC4=N3)=O)c2)=O)c2c(C)noc2n1	Achiral|None|		SPR	Biacore 8K	SA	10mM HEPES pH 7.5, 150mM NaCl, 0.01% Tween 20, 2% DMSO	primary screen	LRRK2	25	30	30	15	3 injections of 50 mM NaOH for 60 sec each at 10 µL/min flow rate; 1 injection of protein for 50 sec at 10 µL/min flow rate to reach 7200-7400 RU; 1 injection of assay buffer without DMSO at 30 µL/min flow rate.	7141.26	47300	100	0.33		Below	No	No	No	0.96																2022-08-05
1183	CACHE_1183_10	c1ccc(cc1)c1cc(C(Nc2cc(cc(c2)C(N)=O)C(N)=O)=O)c2ccccc2n1	Achiral|None|		SPR	Biacore 8K	SA	10mM HEPES pH 7.5, 150mM NaCl, 0.01% Tween 20, 2% DMSO	primary screen	LRRK2	25	30	30	15	3 injections of 50 mM NaOH for 60 sec each at 10 µL/min flow rate; 1 injection of protein for 50 sec at 10 µL/min flow rate to reach 7200-7400 RU; 1 injection of assay buffer without DMSO at 30 µL/min flow rate.	7304.04	47300	50	1.33		Above	No	No	No	0.52																2022-08-05
1183	CACHE_1183_10	c1ccc(cc1)c1cc(C(Nc2cc(cc(c2)C(N)=O)C(N)=O)=O)c2ccccc2n1	Achiral|None|		SPR	Biacore 8K	SA	10mM HEPES pH 7.5, 150mM NaCl, 0.01% Tween 20, 2% DMSO	primary screen	LRRK2	25	30	30	15	3 injections of 50 mM NaOH for 60 sec each at 10 µL/min flow rate; 1 injection of protein for 50 sec at 10 µL/min flow rate to reach 7200-7400 RU; 1 injection of assay buffer without DMSO at 30 µL/min flow rate.	7108.03	47300	100	1.42		Above	No	No	No	2.51																2022-08-05
1183	CACHE_1183_10	c1ccc(cc1)c1cc(C(Nc2cc(cc(c2)C(N)=O)C(N)=O)=O)c2ccccc2n1	Achiral|None|		SPR	Biacore 8K	SA	10mM HEPES pH 7.5, 150mM NaCl, 0.01% Tween 20, 2% DMSO	hit confirmation -dose response	LRRK2	25	30	60	120	3 injections of 50 mM NaOH for 60 sec each at 10 µL/min flow rate; 1 injection of protein for 50 sec at 10 µL/min flow rate to reach 6200-6700 RU; 1 injection of assay buffer without DMSO at 30 µL/min flow rate.	6570.62	47300									2.5	200	5.9E-6	5.92E-06	0.25	50.68	50.7	Bad fitting	0.77	-13.26	-0.18	418.43	90.64	90.665236	55.92	2022-11-22
1183	CACHE_1183_11	Cc1ccc(c(c1)F)n1c2CCCc2c(C(Nc2ccccc2n2c3c(cn2)C(NC=N3)=O)=O)n1	Achiral|None|		SPR	Biacore 8K	SA	10mM HEPES pH 7.5, 150mM NaCl, 0.01% Tween 20, 2% DMSO	primary screen	LRRK2	25	30	30	15	3 injections of 50 mM NaOH for 60 sec each at 10 µL/min flow rate; 1 injection of protein for 50 sec at 10 µL/min flow rate to reach 7200-7400 RU; 1 injection of assay buffer without DMSO at 30 µL/min flow rate.	7294.16	47300	50	0.055		Below	No	No	No	0.59																2022-08-05
1183	CACHE_1183_11	Cc1ccc(c(c1)F)n1c2CCCc2c(C(Nc2ccccc2n2c3c(cn2)C(NC=N3)=O)=O)n1	Achiral|None|		SPR	Biacore 8K	SA	10mM HEPES pH 7.5, 150mM NaCl, 0.01% Tween 20, 2% DMSO	primary screen	LRRK2	25	30	30	15	3 injections of 50 mM NaOH for 60 sec each at 10 µL/min flow rate; 1 injection of protein for 50 sec at 10 µL/min flow rate to reach 7200-7400 RU; 1 injection of assay buffer without DMSO at 30 µL/min flow rate.	7087.22	47300	100	0.086		Below	No	No	No	0.32																2022-08-05
1183	CACHE_1183_12	Cc1ccc(c2cc(C(Nc3cccc(c3)C(NCCC(N)=O)=O)=O)c3ccccc3n2)o1	Achiral|None|		SPR	Biacore 8K	SA	10mM HEPES pH 7.5, 150mM NaCl, 0.01% Tween 20, 2% DMSO	primary screen	LRRK2	25	30	30	15	3 injections of 50 mM NaOH for 60 sec each at 10 µL/min flow rate; 1 injection of protein for 50 sec at 10 µL/min flow rate to reach 7200-7400 RU; 1 injection of assay buffer without DMSO at 30 µL/min flow rate.	7336.49	47300	50	-0.48		Below	No	No	No	11.91																2022-08-05
1183	CACHE_1183_12	Cc1ccc(c2cc(C(Nc3cccc(c3)C(NCCC(N)=O)=O)=O)c3ccccc3n2)o1	Achiral|None|		SPR	Biacore 8K	SA	10mM HEPES pH 7.5, 150mM NaCl, 0.01% Tween 20, 2% DMSO	primary screen	LRRK2	25	30	30	15	3 injections of 50 mM NaOH for 60 sec each at 10 µL/min flow rate; 1 injection of protein for 50 sec at 10 µL/min flow rate to reach 7200-7400 RU; 1 injection of assay buffer without DMSO at 30 µL/min flow rate.	7141.26	47300	100	-0.59		Below	No	No	No	29.03																2022-08-05
1183	CACHE_1183_13	C[C@@H](C(NCCc1ccccc1)=O)NC(c1cc(Cc2ccccc2)n[nH]1)=O	Single known enantiomer|None|		SPR	Biacore 8K	SA	10mM HEPES pH 7.5, 150mM NaCl, 0.01% Tween 20, 2% DMSO	primary screen	LRRK2	25	30	30	15	3 injections of 50 mM NaOH for 60 sec each at 10 µL/min flow rate; 1 injection of protein for 50 sec at 10 µL/min flow rate to reach 7200-7400 RU; 1 injection of assay buffer without DMSO at 30 µL/min flow rate.	7236.07	47300	50	0.39		Above	No	No	No	-0.23																2022-08-05
1183	CACHE_1183_13	C[C@@H](C(NCCc1ccccc1)=O)NC(c1cc(Cc2ccccc2)n[nH]1)=O	Single known enantiomer|None|		SPR	Biacore 8K	SA	10mM HEPES pH 7.5, 150mM NaCl, 0.01% Tween 20, 2% DMSO	primary screen	LRRK2	25	30	30	15	3 injections of 50 mM NaOH for 60 sec each at 10 µL/min flow rate; 1 injection of protein for 50 sec at 10 µL/min flow rate to reach 7200-7400 RU; 1 injection of assay buffer without DMSO at 30 µL/min flow rate.	7061.69	47300	100	0.91		Above	No	No	No	-1.9																2022-08-05
1183	CACHE_1183_13	C[C@@H](C(NCCc1ccccc1)=O)NC(c1cc(Cc2ccccc2)n[nH]1)=O	Single known enantiomer|None|		SPR	Biacore 8K	SA	10mM HEPES pH 7.5, 150mM NaCl, 0.01% Tween 20, 2% DMSO	hit confirmation -dose response	LRRK2	25	30	60	120	3 injections of 50 mM NaOH for 60 sec each at 10 µL/min flow rate; 1 injection of protein for 50 sec at 10 µL/min flow rate to reach 6200-6700 RU; 1 injection of assay buffer without DMSO at 30 µL/min flow rate.	6570.62	47300									2.5	200	1.27	NA	0.29	219862.84	NA	Linear up to the highest concentration tested	0.29	2.03	10.67	0.11	393172.64		55.92	2022-11-22
1183	CACHE_1183_14	c1ccc(cc1)c1cc(C(Nc2cccc(c2)c2nnc[nH]2)=O)c2ccccc2n1	Achiral|None|		SPR	Biacore 8K	SA	10mM HEPES pH 7.5, 150mM NaCl, 0.01% Tween 20, 2% DMSO	primary screen	LRRK2	25	30	30	15	3 injections of 50 mM NaOH for 60 sec each at 10 µL/min flow rate; 1 injection of protein for 50 sec at 10 µL/min flow rate to reach 7200-7400 RU; 1 injection of assay buffer without DMSO at 30 µL/min flow rate.	7338.46	47300	50	0.14		Below	No	No	No	0.69																2022-08-05
1183	CACHE_1183_14	c1ccc(cc1)c1cc(C(Nc2cccc(c2)c2nnc[nH]2)=O)c2ccccc2n1	Achiral|None|		SPR	Biacore 8K	SA	10mM HEPES pH 7.5, 150mM NaCl, 0.01% Tween 20, 2% DMSO	primary screen	LRRK2	25	30	30	15	3 injections of 50 mM NaOH for 60 sec each at 10 µL/min flow rate; 1 injection of protein for 50 sec at 10 µL/min flow rate to reach 7200-7400 RU; 1 injection of assay buffer without DMSO at 30 µL/min flow rate.	7142.24	47300	100	0.29		Below	No	No	No	-24.66																2022-08-05
1183	CACHE_1183_15	Cc1ccc(cc1NC(C1C=CC(N(C=1)c1cccc(c1)[Cl])=O)=O)c1nnco1	Achiral|None|		SPR	Biacore 8K	SA	10mM HEPES pH 7.5, 150mM NaCl, 0.01% Tween 20, 2% DMSO	primary screen	LRRK2	25	30	30	15	3 injections of 50 mM NaOH for 60 sec each at 10 µL/min flow rate; 1 injection of protein for 50 sec at 10 µL/min flow rate to reach 7200-7400 RU; 1 injection of assay buffer without DMSO at 30 µL/min flow rate.	7338.46	47300	50	0.48		Above	No	No	No	0.31																2022-08-05
1183	CACHE_1183_15	Cc1ccc(cc1NC(C1C=CC(N(C=1)c1cccc(c1)[Cl])=O)=O)c1nnco1	Achiral|None|		SPR	Biacore 8K	SA	10mM HEPES pH 7.5, 150mM NaCl, 0.01% Tween 20, 2% DMSO	primary screen	LRRK2	25	30	30	15	3 injections of 50 mM NaOH for 60 sec each at 10 µL/min flow rate; 1 injection of protein for 50 sec at 10 µL/min flow rate to reach 7200-7400 RU; 1 injection of assay buffer without DMSO at 30 µL/min flow rate.	7142.24	47300	100	1.1		Above	No	No	No	0.84																2022-08-05
1183	CACHE_1183_15	Cc1ccc(cc1NC(C1C=CC(N(C=1)c1cccc(c1)[Cl])=O)=O)c1nnco1	Achiral|None|		SPR	Biacore 8K	SA	10mM HEPES pH 7.5, 150mM NaCl, 0.01% Tween 20, 2% DMSO	hit confirmation -dose response	LRRK2	25	30	60	120	3 injections of 50 mM NaOH for 60 sec each at 10 µL/min flow rate; 1 injection of protein for 50 sec at 10 µL/min flow rate to reach 6200-6700 RU; 1 injection of assay buffer without DMSO at 30 µL/min flow rate.	6575.81	47300									2.5	200	0.0014	NA	3.52	351.98	NA	Linear up to the highest concentration tested	4.04	-0.38	-1.73	0.086	628.93		55.96	2022-11-22
1183	CACHE_1183_16	COc1ccc2c(n1)sc(NC(NCc1cc(c3ccc4ccccc4c3)on1)=O)n2	Achiral|None|		SPR	Biacore 8K	SA	10mM HEPES pH 7.5, 150mM NaCl, 0.01% Tween 20, 2% DMSO	primary screen	LRRK2	25	30	30	15	3 injections of 50 mM NaOH for 60 sec each at 10 µL/min flow rate; 1 injection of protein for 50 sec at 10 µL/min flow rate to reach 7200-7400 RU; 1 injection of assay buffer without DMSO at 30 µL/min flow rate.	7336.49	47300	50	0.012		Below	No	No	No	2.96																2022-08-05
1183	CACHE_1183_16	COc1ccc2c(n1)sc(NC(NCc1cc(c3ccc4ccccc4c3)on1)=O)n2	Achiral|None|		SPR	Biacore 8K	SA	10mM HEPES pH 7.5, 150mM NaCl, 0.01% Tween 20, 2% DMSO	primary screen	LRRK2	25	30	30	15	3 injections of 50 mM NaOH for 60 sec each at 10 µL/min flow rate; 1 injection of protein for 50 sec at 10 µL/min flow rate to reach 7200-7400 RU; 1 injection of assay buffer without DMSO at 30 µL/min flow rate.	7141.26	47300	100	0.092		Below	No	No	No	0.086																2022-08-05
1183	CACHE_1183_17	Cc1cc(ccc1F)c1nc(CNC2(CCOCC2)Cc2ccc(cc2)F)on1	Achiral|None|		SPR	Biacore 8K	SA	10mM HEPES pH 7.5, 150mM NaCl, 0.01% Tween 20, 2% DMSO	primary screen	LRRK2	25	30	30	15	3 injections of 50 mM NaOH for 60 sec each at 10 µL/min flow rate; 1 injection of protein for 50 sec at 10 µL/min flow rate to reach 7200-7400 RU; 1 injection of assay buffer without DMSO at 30 µL/min flow rate.	7304.04	47300	50	0.14		Below	No	No	No	0.38																2022-08-05
1183	CACHE_1183_17	Cc1cc(ccc1F)c1nc(CNC2(CCOCC2)Cc2ccc(cc2)F)on1	Achiral|None|		SPR	Biacore 8K	SA	10mM HEPES pH 7.5, 150mM NaCl, 0.01% Tween 20, 2% DMSO	primary screen	LRRK2	25	30	30	15	3 injections of 50 mM NaOH for 60 sec each at 10 µL/min flow rate; 1 injection of protein for 50 sec at 10 µL/min flow rate to reach 7200-7400 RU; 1 injection of assay buffer without DMSO at 30 µL/min flow rate.	7108.03	47300	100	-0.027		Below	No	No	No	1.57																2022-08-05
1183	CACHE_1183_18	C(c1ccc(s1)S(N)(=O)=O)NC(c1ccc2c(c1)c(c1ccc(cc1)F)on2)=O	Achiral|None|		SPR	Biacore 8K	SA	10mM HEPES pH 7.5, 150mM NaCl, 0.01% Tween 20, 2% DMSO	primary screen	LRRK2	25	30	30	15	3 injections of 50 mM NaOH for 60 sec each at 10 µL/min flow rate; 1 injection of protein for 50 sec at 10 µL/min flow rate to reach 7200-7400 RU; 1 injection of assay buffer without DMSO at 30 µL/min flow rate.	7294.16	47300	50	0.14		Below	No	No	No	1.39																2022-08-05
1183	CACHE_1183_18	C(c1ccc(s1)S(N)(=O)=O)NC(c1ccc2c(c1)c(c1ccc(cc1)F)on2)=O	Achiral|None|		SPR	Biacore 8K	SA	10mM HEPES pH 7.5, 150mM NaCl, 0.01% Tween 20, 2% DMSO	primary screen	LRRK2	25	30	30	15	3 injections of 50 mM NaOH for 60 sec each at 10 µL/min flow rate; 1 injection of protein for 50 sec at 10 µL/min flow rate to reach 7200-7400 RU; 1 injection of assay buffer without DMSO at 30 µL/min flow rate.	7087.22	47300	100	0.33		Below	No	No	No	1.88																2022-08-05
1183	CACHE_1183_19	C1Cc2c(cccc2N(C1)S(c1ccc2c(c1)C(NC(N2)=O)=O)(=O)=O)NC(c1ccc(cc1)F)=O	Achiral|None|		SPR	Biacore 8K	SA	10mM HEPES pH 7.5, 150mM NaCl, 0.01% Tween 20, 2% DMSO	primary screen	LRRK2	25	30	30	15	3 injections of 50 mM NaOH for 60 sec each at 10 µL/min flow rate; 1 injection of protein for 50 sec at 10 µL/min flow rate to reach 7200-7400 RU; 1 injection of assay buffer without DMSO at 30 µL/min flow rate.	7260.25	47300	50	0.034		Below	No	No	No	0.31																2022-08-05
1183	CACHE_1183_19	C1Cc2c(cccc2N(C1)S(c1ccc2c(c1)C(NC(N2)=O)=O)(=O)=O)NC(c1ccc(cc1)F)=O	Achiral|None|		SPR	Biacore 8K	SA	10mM HEPES pH 7.5, 150mM NaCl, 0.01% Tween 20, 2% DMSO	primary screen	LRRK2	25	30	30	15	3 injections of 50 mM NaOH for 60 sec each at 10 µL/min flow rate; 1 injection of protein for 50 sec at 10 µL/min flow rate to reach 7200-7400 RU; 1 injection of assay buffer without DMSO at 30 µL/min flow rate.	7034.16	47300	100	0.095		Below	No	No	No	-0.53																2022-08-05
1183	CACHE_1183_2	Cc1ccc2c(c1)c(cc(c1cccs1)n2)C(Nc1cccc(c1)C(N(C)CC(N)=O)=O)=O	Achiral|None|		SPR	Biacore 8K	SA	10mM HEPES pH 7.5, 150mM NaCl, 0.01% Tween 20, 2% DMSO	primary screen	LRRK2	25	30	30	15	3 injections of 50 mM NaOH for 60 sec each at 10 µL/min flow rate; 1 injection of protein for 50 sec at 10 µL/min flow rate to reach 7200-7400 RU; 1 injection of assay buffer without DMSO at 30 µL/min flow rate.	7304.04	47300	50	0.85		Above	No	No	No	-0.37																2022-08-05
1183	CACHE_1183_2	Cc1ccc2c(c1)c(cc(c1cccs1)n2)C(Nc1cccc(c1)C(N(C)CC(N)=O)=O)=O	Achiral|None|		SPR	Biacore 8K	SA	10mM HEPES pH 7.5, 150mM NaCl, 0.01% Tween 20, 2% DMSO	primary screen	LRRK2	25	30	30	15	3 injections of 50 mM NaOH for 60 sec each at 10 µL/min flow rate; 1 injection of protein for 50 sec at 10 µL/min flow rate to reach 7200-7400 RU; 1 injection of assay buffer without DMSO at 30 µL/min flow rate.	7108.03	47300	100	0.94		Above	No	No	No	-0.03																2022-08-05
1183	CACHE_1183_2	Cc1ccc2c(c1)c(cc(c1cccs1)n2)C(Nc1cccc(c1)C(N(C)CC(N)=O)=O)=O	Achiral|None|		SPR	Biacore 8K	SA	10mM HEPES pH 7.5, 150mM NaCl, 0.01% Tween 20, 2% DMSO	hit confirmation -dose response	LRRK2	25	30	60	120	3 injections of 50 mM NaOH for 60 sec each at 10 µL/min flow rate; 1 injection of protein for 50 sec at 10 µL/min flow rate to reach 6200-6700 RU; 1 injection of assay buffer without DMSO at 30 µL/min flow rate.	6587.82	47300									2.5	200	3.2E-5	3.19E-05	1.11	51.03	38		5.08	-0.71	-0.091	39.4	91.02	67.772427	56.07	2022-11-22
1183	CACHE_1183_20	Cc1nc(c2cnn(c3cccc(c3)F)c2n1)NCc1cccc(c1)OCC(N)=O	Achiral|None|		SPR	Biacore 8K	SA	10mM HEPES pH 7.5, 150mM NaCl, 0.01% Tween 20, 2% DMSO	primary screen	LRRK2	25	30	30	15	3 injections of 50 mM NaOH for 60 sec each at 10 µL/min flow rate; 1 injection of protein for 50 sec at 10 µL/min flow rate to reach 7200-7400 RU; 1 injection of assay buffer without DMSO at 30 µL/min flow rate.	7338.46	47300	50	0.13		Below	No	No	No	0.65																2022-08-05
1183	CACHE_1183_20	Cc1nc(c2cnn(c3cccc(c3)F)c2n1)NCc1cccc(c1)OCC(N)=O	Achiral|None|		SPR	Biacore 8K	SA	10mM HEPES pH 7.5, 150mM NaCl, 0.01% Tween 20, 2% DMSO	primary screen	LRRK2	25	30	30	15	3 injections of 50 mM NaOH for 60 sec each at 10 µL/min flow rate; 1 injection of protein for 50 sec at 10 µL/min flow rate to reach 7200-7400 RU; 1 injection of assay buffer without DMSO at 30 µL/min flow rate.	7142.24	47300	100	0.19		Below	No	No	No	1.51																2022-08-05
1183	CACHE_1183_21	Cc1ccc(cc1)c1cnc(CCC(Nc2cc(C3CCCCC3)[nH]n2)=O)o1	Achiral|None|		SPR	Biacore 8K	SA	10mM HEPES pH 7.5, 150mM NaCl, 0.01% Tween 20, 2% DMSO	primary screen	LRRK2	25	30	30	15	3 injections of 50 mM NaOH for 60 sec each at 10 µL/min flow rate; 1 injection of protein for 50 sec at 10 µL/min flow rate to reach 7200-7400 RU; 1 injection of assay buffer without DMSO at 30 µL/min flow rate.	7236.07	47300	50	0.016		Below	No	No	No	-0.24																2022-08-05
1183	CACHE_1183_21	Cc1ccc(cc1)c1cnc(CCC(Nc2cc(C3CCCCC3)[nH]n2)=O)o1	Achiral|None|		SPR	Biacore 8K	SA	10mM HEPES pH 7.5, 150mM NaCl, 0.01% Tween 20, 2% DMSO	primary screen	LRRK2	25	30	30	15	3 injections of 50 mM NaOH for 60 sec each at 10 µL/min flow rate; 1 injection of protein for 50 sec at 10 µL/min flow rate to reach 7200-7400 RU; 1 injection of assay buffer without DMSO at 30 µL/min flow rate.	7061.69	47300	100	0.093		Below	No	No	No	1.69																2022-08-05
1183	CACHE_1183_22	C(c1ccc(C(N[C@H](CO)c2ccccc2)=O)o1)n1cc(c2ccc3cnccc3c2)nn1	Single known enantiomer|None|		SPR	Biacore 8K	SA	10mM HEPES pH 7.5, 150mM NaCl, 0.01% Tween 20, 2% DMSO	primary screen	LRRK2	25	30	30	15	3 injections of 50 mM NaOH for 60 sec each at 10 µL/min flow rate; 1 injection of protein for 50 sec at 10 µL/min flow rate to reach 7200-7400 RU; 1 injection of assay buffer without DMSO at 30 µL/min flow rate.	7322.2	47300	50	0.96		Above	No	Yes	No	1.12																2022-08-05
1183	CACHE_1183_22	C(c1ccc(C(N[C@H](CO)c2ccccc2)=O)o1)n1cc(c2ccc3cnccc3c2)nn1	Single known enantiomer|None|		SPR	Biacore 8K	SA	10mM HEPES pH 7.5, 150mM NaCl, 0.01% Tween 20, 2% DMSO	primary screen	LRRK2	25	30	30	15	3 injections of 50 mM NaOH for 60 sec each at 10 µL/min flow rate; 1 injection of protein for 50 sec at 10 µL/min flow rate to reach 7200-7400 RU; 1 injection of assay buffer without DMSO at 30 µL/min flow rate.	7084	47300	100	1.82		Above	Yes	Yes	No	1.23																2022-08-05
1183	CACHE_1183_22	C(c1ccc(C(N[C@H](CO)c2ccccc2)=O)o1)n1cc(c2ccc3cnccc3c2)nn1	Single known enantiomer|None|		SPR	Biacore 8K	SA	10mM HEPES pH 7.5, 150mM NaCl, 0.01% Tween 20, 2% DMSO	hit confirmation -dose response	LRRK2	25	30	60	120	3 injections of 50 mM NaOH for 60 sec each at 10 µL/min flow rate; 1 injection of protein for 50 sec at 10 µL/min flow rate to reach 6200-6700 RU; 1 injection of assay buffer without DMSO at 30 µL/min flow rate.	6598.46	47300									2.5	200	8.2E-5	8.21E-05	2.36	182	125		7.32	-2.73	-0.37	61.72	324.1	222.578348	56.16	2022-11-22
1183	CACHE_1183_23	C1CC1NS(c1ccc(cc1)NC(c1cc(c2ccccc2)nc2ccccc12)=O)(=O)=O	Achiral|None|		SPR	Biacore 8K	SA	10mM HEPES pH 7.5, 150mM NaCl, 0.01% Tween 20, 2% DMSO	primary screen	LRRK2	25	30	30	15	3 injections of 50 mM NaOH for 60 sec each at 10 µL/min flow rate; 1 injection of protein for 50 sec at 10 µL/min flow rate to reach 7200-7400 RU; 1 injection of assay buffer without DMSO at 30 µL/min flow rate.	7260.25	47300	50	-0.0073		Below	No	No	No	0.064																2022-08-05
1183	CACHE_1183_23	C1CC1NS(c1ccc(cc1)NC(c1cc(c2ccccc2)nc2ccccc12)=O)(=O)=O	Achiral|None|		SPR	Biacore 8K	SA	10mM HEPES pH 7.5, 150mM NaCl, 0.01% Tween 20, 2% DMSO	primary screen	LRRK2	25	30	30	15	3 injections of 50 mM NaOH for 60 sec each at 10 µL/min flow rate; 1 injection of protein for 50 sec at 10 µL/min flow rate to reach 7200-7400 RU; 1 injection of assay buffer without DMSO at 30 µL/min flow rate.	7034.16	47300	100	0.058		Below	No	No	No	0.15																2022-08-05
1183	CACHE_1183_24	C1C(CC1(F)F)NC(c1c2ccc(cc2sn1)Nc1c2c(cccn2)[nH]n1)=O	Achiral|None|		SPR	Biacore 8K	SA	10mM HEPES pH 7.5, 150mM NaCl, 0.01% Tween 20, 2% DMSO	primary screen	LRRK2	25	30	30	15	3 injections of 50 mM NaOH for 60 sec each at 10 µL/min flow rate; 1 injection of protein for 50 sec at 10 µL/min flow rate to reach 7200-7400 RU; 1 injection of assay buffer without DMSO at 30 µL/min flow rate.	7304.04	47300	50	0.084		Below	No	No	No	0.55																2022-08-05
1183	CACHE_1183_24	C1C(CC1(F)F)NC(c1c2ccc(cc2sn1)Nc1c2c(cccn2)[nH]n1)=O	Achiral|None|		SPR	Biacore 8K	SA	10mM HEPES pH 7.5, 150mM NaCl, 0.01% Tween 20, 2% DMSO	primary screen	LRRK2	25	30	30	15	3 injections of 50 mM NaOH for 60 sec each at 10 µL/min flow rate; 1 injection of protein for 50 sec at 10 µL/min flow rate to reach 7200-7400 RU; 1 injection of assay buffer without DMSO at 30 µL/min flow rate.	7108.03	47300	100	0.19		Below	No	No	No	0.89																2022-08-05
1183	CACHE_1183_25	C(c1cccnc1)n1c2c(cn1)c(cc(c1ccccc1)n2)C(Nc1cccc2c1nc[nH]2)=O	Achiral|None|		SPR	Biacore 8K	SA	10mM HEPES pH 7.5, 150mM NaCl, 0.01% Tween 20, 2% DMSO	primary screen	LRRK2	25	30	30	15	3 injections of 50 mM NaOH for 60 sec each at 10 µL/min flow rate; 1 injection of protein for 50 sec at 10 µL/min flow rate to reach 7200-7400 RU; 1 injection of assay buffer without DMSO at 30 µL/min flow rate.	7295.64	47300	50	0.39		Above	No	No	No	1.1																2022-08-05
1183	CACHE_1183_25	C(c1cccnc1)n1c2c(cn1)c(cc(c1ccccc1)n2)C(Nc1cccc2c1nc[nH]2)=O	Achiral|None|		SPR	Biacore 8K	SA	10mM HEPES pH 7.5, 150mM NaCl, 0.01% Tween 20, 2% DMSO	primary screen	LRRK2	25	30	30	15	3 injections of 50 mM NaOH for 60 sec each at 10 µL/min flow rate; 1 injection of protein for 50 sec at 10 µL/min flow rate to reach 7200-7400 RU; 1 injection of assay buffer without DMSO at 30 µL/min flow rate.	7057.4	47300	100	0.73		Above	No	No	No	1.47																2022-08-05
1183	CACHE_1183_25	C(c1cccnc1)n1c2c(cn1)c(cc(c1ccccc1)n2)C(Nc1cccc2c1nc[nH]2)=O	Achiral|None|		SPR	Biacore 8K	SA	10mM HEPES pH 7.5, 150mM NaCl, 0.01% Tween 20, 2% DMSO	hit confirmation -dose response	LRRK2	25	30	60	120	3 injections of 50 mM NaOH for 60 sec each at 10 µL/min flow rate; 1 injection of protein for 50 sec at 10 µL/min flow rate to reach 6200-6700 RU; 1 injection of assay buffer without DMSO at 30 µL/min flow rate.	6275.87	47300									2.5	200	1.6E-5	1.58E-05	3.76	52.15	42		17.31	-0.56	-0.17	3.59	97.64	78.636959	53.41	2022-11-22
1183	CACHE_1183_26	CC(N1CCc2cc(ccc12)NC(c1cc(c2ccc(C)o2)nc2ccccc12)=O)=O	Achiral|None|		SPR	Biacore 8K	SA	10mM HEPES pH 7.5, 150mM NaCl, 0.01% Tween 20, 2% DMSO	primary screen	LRRK2	25	30	30	15	3 injections of 50 mM NaOH for 60 sec each at 10 µL/min flow rate; 1 injection of protein for 50 sec at 10 µL/min flow rate to reach 7200-7400 RU; 1 injection of assay buffer without DMSO at 30 µL/min flow rate.	7260.25	47300	50	0.071		Below	No	No	No	0.48																2022-08-05
1183	CACHE_1183_26	CC(N1CCc2cc(ccc12)NC(c1cc(c2ccc(C)o2)nc2ccccc12)=O)=O	Achiral|None|		SPR	Biacore 8K	SA	10mM HEPES pH 7.5, 150mM NaCl, 0.01% Tween 20, 2% DMSO	primary screen	LRRK2	25	30	30	15	3 injections of 50 mM NaOH for 60 sec each at 10 µL/min flow rate; 1 injection of protein for 50 sec at 10 µL/min flow rate to reach 7200-7400 RU; 1 injection of assay buffer without DMSO at 30 µL/min flow rate.	7034.16	47300	100	0.19		Below	No	No	No	-0.034																2022-08-05
1183	CACHE_1183_27	C1Cc2c(c[nH]n2)N(C1)C(c1ccc(CNS(c2ccc3ccccc3c2)(=O)=O)cc1)=O	Achiral|None|		SPR	Biacore 8K	SA	10mM HEPES pH 7.5, 150mM NaCl, 0.01% Tween 20, 2% DMSO	primary screen	LRRK2	25	30	30	15	3 injections of 50 mM NaOH for 60 sec each at 10 µL/min flow rate; 1 injection of protein for 50 sec at 10 µL/min flow rate to reach 7200-7400 RU; 1 injection of assay buffer without DMSO at 30 µL/min flow rate.	7322.2	47300	50	0.29		Below	No	No	No	0.9																2022-08-05
1183	CACHE_1183_27	C1Cc2c(c[nH]n2)N(C1)C(c1ccc(CNS(c2ccc3ccccc3c2)(=O)=O)cc1)=O	Achiral|None|		SPR	Biacore 8K	SA	10mM HEPES pH 7.5, 150mM NaCl, 0.01% Tween 20, 2% DMSO	primary screen	LRRK2	25	30	30	15	3 injections of 50 mM NaOH for 60 sec each at 10 µL/min flow rate; 1 injection of protein for 50 sec at 10 µL/min flow rate to reach 7200-7400 RU; 1 injection of assay buffer without DMSO at 30 µL/min flow rate.	7084	47300	100	0.49		Below	No	No	No	1.84																2022-08-05
1183	CACHE_1183_27	C1Cc2c(c[nH]n2)N(C1)C(c1ccc(CNS(c2ccc3ccccc3c2)(=O)=O)cc1)=O	Achiral|None|		SPR	Biacore 8K	SA	10mM HEPES pH 7.5, 150mM NaCl, 0.01% Tween 20, 2% DMSO	hit confirmation -dose response	LRRK2	25	30	60	120	3 injections of 50 mM NaOH for 60 sec each at 10 µL/min flow rate; 1 injection of protein for 50 sec at 10 µL/min flow rate to reach 6200-6700 RU; 1 injection of assay buffer without DMSO at 30 µL/min flow rate.	6575.81	47300									2.5	200	0.13	NA	0.033	2726.12	NA	Linear up to the highest concentration tested	0.033	10.43	6.71	7.29	4871.18		55.96	2022-11-22
1183	CACHE_1183_28	C(c1cccc(c1)NC(N)=O)NC(c1ccc2nnc(c3ccccc3)n2c1)=O	Achiral|None|		SPR	Biacore 8K	SA	10mM HEPES pH 7.5, 150mM NaCl, 0.01% Tween 20, 2% DMSO	primary screen	LRRK2	25	30	30	15	3 injections of 50 mM NaOH for 60 sec each at 10 µL/min flow rate; 1 injection of protein for 50 sec at 10 µL/min flow rate to reach 7200-7400 RU; 1 injection of assay buffer without DMSO at 30 µL/min flow rate.	7295.64	47300	50	0.33		Below	No	No	No	-0.13																2022-08-05
1183	CACHE_1183_28	C(c1cccc(c1)NC(N)=O)NC(c1ccc2nnc(c3ccccc3)n2c1)=O	Achiral|None|		SPR	Biacore 8K	SA	10mM HEPES pH 7.5, 150mM NaCl, 0.01% Tween 20, 2% DMSO	primary screen	LRRK2	25	30	30	15	3 injections of 50 mM NaOH for 60 sec each at 10 µL/min flow rate; 1 injection of protein for 50 sec at 10 µL/min flow rate to reach 7200-7400 RU; 1 injection of assay buffer without DMSO at 30 µL/min flow rate.	7057.4	47300	100	0.26		Below	No	No	No	2.33																2022-08-05
1183	CACHE_1183_29	Cc1c(cnn1C1C=CC(NN=1)=O)C(Nc1cccc(c1)NC(c1cccc(c1)C(F)(F)F)=O)=O	Achiral|None|		SPR	Biacore 8K	SA	10mM HEPES pH 7.5, 150mM NaCl, 0.01% Tween 20, 2% DMSO	primary screen	LRRK2	25	30	30	15	3 injections of 50 mM NaOH for 60 sec each at 10 µL/min flow rate; 1 injection of protein for 50 sec at 10 µL/min flow rate to reach 7200-7400 RU; 1 injection of assay buffer without DMSO at 30 µL/min flow rate.	7322.2	47300	50	-0.0077		Below	No	No	No	1.5																2022-08-05
1183	CACHE_1183_29	Cc1c(cnn1C1C=CC(NN=1)=O)C(Nc1cccc(c1)NC(c1cccc(c1)C(F)(F)F)=O)=O	Achiral|None|		SPR	Biacore 8K	SA	10mM HEPES pH 7.5, 150mM NaCl, 0.01% Tween 20, 2% DMSO	primary screen	LRRK2	25	30	30	15	3 injections of 50 mM NaOH for 60 sec each at 10 µL/min flow rate; 1 injection of protein for 50 sec at 10 µL/min flow rate to reach 7200-7400 RU; 1 injection of assay buffer without DMSO at 30 µL/min flow rate.	7084	47300	100	-0.61		Below	No	No	No	15.35																2022-08-05
1183	CACHE_1183_3	CCCCN1C(NC(c2cc(cnc12)C(Nc1ccc2c(c1)nc(Cc1ccc(cc1)F)[nH]2)=O)=O)=O	Achiral|None|		SPR	Biacore 8K	SA	10mM HEPES pH 7.5, 150mM NaCl, 0.01% Tween 20, 2% DMSO	primary screen	LRRK2	25	30	30	15	3 injections of 50 mM NaOH for 60 sec each at 10 µL/min flow rate; 1 injection of protein for 50 sec at 10 µL/min flow rate to reach 7200-7400 RU; 1 injection of assay buffer without DMSO at 30 µL/min flow rate.	7295.64	47300	50	0.18		Below	No	No	No	-0.25																2022-08-05
1183	CACHE_1183_3	CCCCN1C(NC(c2cc(cnc12)C(Nc1ccc2c(c1)nc(Cc1ccc(cc1)F)[nH]2)=O)=O)=O	Achiral|None|		SPR	Biacore 8K	SA	10mM HEPES pH 7.5, 150mM NaCl, 0.01% Tween 20, 2% DMSO	primary screen	LRRK2	25	30	30	15	3 injections of 50 mM NaOH for 60 sec each at 10 µL/min flow rate; 1 injection of protein for 50 sec at 10 µL/min flow rate to reach 7200-7400 RU; 1 injection of assay buffer without DMSO at 30 µL/min flow rate.	7057.4	47300	100	0.23		Below	No	No	No	-1.56																2022-08-05
1183	CACHE_1183_30	C1=C(C(Nc2cccc(c2)C(Nc2ccc(cc2)Oc2cccc(c2)C(N)=O)=O)=O)c2ccccc2NC1=O	Achiral|None|		SPR	Biacore 8K	SA	10mM HEPES pH 7.5, 150mM NaCl, 0.01% Tween 20, 2% DMSO	primary screen	LRRK2	25	30	30	15	3 injections of 50 mM NaOH for 60 sec each at 10 µL/min flow rate; 1 injection of protein for 50 sec at 10 µL/min flow rate to reach 7200-7400 RU; 1 injection of assay buffer without DMSO at 30 µL/min flow rate.	7322.2	47300	50	0.36		Above	No	No	No	0.084																2022-08-05
1183	CACHE_1183_30	C1=C(C(Nc2cccc(c2)C(Nc2ccc(cc2)Oc2cccc(c2)C(N)=O)=O)=O)c2ccccc2NC1=O	Achiral|None|		SPR	Biacore 8K	SA	10mM HEPES pH 7.5, 150mM NaCl, 0.01% Tween 20, 2% DMSO	primary screen	LRRK2	25	30	30	15	3 injections of 50 mM NaOH for 60 sec each at 10 µL/min flow rate; 1 injection of protein for 50 sec at 10 µL/min flow rate to reach 7200-7400 RU; 1 injection of assay buffer without DMSO at 30 µL/min flow rate.	7084	47300	100	0.6		Below	No	No	No	-0.26																2022-08-05
1183	CACHE_1183_31	CC(C)(c1cc(C(NCc2ccc(cc2)c2ccc3c(CCO3)c2)=O)[nH]n1)N	Achiral|None|		SPR	Biacore 8K	SA	10mM HEPES pH 7.5, 150mM NaCl, 0.01% Tween 20, 2% DMSO	primary screen	LRRK2	25	30	30	15	3 injections of 50 mM NaOH for 60 sec each at 10 µL/min flow rate; 1 injection of protein for 50 sec at 10 µL/min flow rate to reach 7200-7400 RU; 1 injection of assay buffer without DMSO at 30 µL/min flow rate.	7338.46	47300	50	1.97		Above	No	No	No	3.01																2022-08-05
1183	CACHE_1183_31	CC(C)(c1cc(C(NCc2ccc(cc2)c2ccc3c(CCO3)c2)=O)[nH]n1)N	Achiral|None|		SPR	Biacore 8K	SA	10mM HEPES pH 7.5, 150mM NaCl, 0.01% Tween 20, 2% DMSO	primary screen	LRRK2	25	30	30	15	3 injections of 50 mM NaOH for 60 sec each at 10 µL/min flow rate; 1 injection of protein for 50 sec at 10 µL/min flow rate to reach 7200-7400 RU; 1 injection of assay buffer without DMSO at 30 µL/min flow rate.	7142.24	47300	100	5.32		Above	No	Yes	Yes	6.34																2022-08-05
1183	CACHE_1183_31	CC(C)(c1cc(C(NCc2ccc(cc2)c2ccc3c(CCO3)c2)=O)[nH]n1)N	Achiral|None|		SPR	Biacore 8K	SA	10mM HEPES pH 7.5, 150mM NaCl, 0.01% Tween 20, 2% DMSO	hit confirmation -dose response	LRRK2	25	30	60	120	3 injections of 50 mM NaOH for 60 sec each at 10 µL/min flow rate; 1 injection of protein for 50 sec at 10 µL/min flow rate to reach 6200-6700 RU; 1 injection of assay buffer without DMSO at 30 µL/min flow rate.	6582.03	47300									2.5	200	1.59	NA	0.68	2582625.93	NA	Linear up to the highest concentration tested	0.68	5.57	0.79	151.62	4610411.32		56.02	2022-11-22
1183	CACHE_1183_32	Cc1cc(NC(NCc2ccc(cc2)c2ccn[nH]2)=O)nn1c1cccc(c1)F	Achiral|None|		SPR	Biacore 8K	SA	10mM HEPES pH 7.5, 150mM NaCl, 0.01% Tween 20, 2% DMSO	primary screen	LRRK2	25	30	30	15	3 injections of 50 mM NaOH for 60 sec each at 10 µL/min flow rate; 1 injection of protein for 50 sec at 10 µL/min flow rate to reach 7200-7400 RU; 1 injection of assay buffer without DMSO at 30 µL/min flow rate.	7260.25	47300	50	0.13		Below	No	No	No	0.32																2022-08-05
1183	CACHE_1183_32	Cc1cc(NC(NCc2ccc(cc2)c2ccn[nH]2)=O)nn1c1cccc(c1)F	Achiral|None|		SPR	Biacore 8K	SA	10mM HEPES pH 7.5, 150mM NaCl, 0.01% Tween 20, 2% DMSO	primary screen	LRRK2	25	30	30	15	3 injections of 50 mM NaOH for 60 sec each at 10 µL/min flow rate; 1 injection of protein for 50 sec at 10 µL/min flow rate to reach 7200-7400 RU; 1 injection of assay buffer without DMSO at 30 µL/min flow rate.	7034.16	47300	100	0.21		Below	No	No	No	0.56																2022-08-05
1183	CACHE_1183_33	C(c1ccc(cc1)c1ccn[nH]1)NC(Nc1cnn(Cc2ccccn2)c1)=O	Achiral|None|		SPR	Biacore 8K	SA	10mM HEPES pH 7.5, 150mM NaCl, 0.01% Tween 20, 2% DMSO	primary screen	LRRK2	25	30	30	15	3 injections of 50 mM NaOH for 60 sec each at 10 µL/min flow rate; 1 injection of protein for 50 sec at 10 µL/min flow rate to reach 7200-7400 RU; 1 injection of assay buffer without DMSO at 30 µL/min flow rate.	7304.04	47300	50	-0.15		Below	No	No	No	-1.19																2022-08-05
1183	CACHE_1183_33	C(c1ccc(cc1)c1ccn[nH]1)NC(Nc1cnn(Cc2ccccn2)c1)=O	Achiral|None|		SPR	Biacore 8K	SA	10mM HEPES pH 7.5, 150mM NaCl, 0.01% Tween 20, 2% DMSO	primary screen	LRRK2	25	30	30	15	3 injections of 50 mM NaOH for 60 sec each at 10 µL/min flow rate; 1 injection of protein for 50 sec at 10 µL/min flow rate to reach 7200-7400 RU; 1 injection of assay buffer without DMSO at 30 µL/min flow rate.	7108.03	47300	100	-0.082		Below	No	No	No	-1.93																2022-08-05
1183	CACHE_1183_34	C1CCc2c(C1)c(C(NCc1ccc3CN(Cc3c1)C(c1c3CCCCc3n[nH]1)=O)=O)[nH]n2	Achiral|None|		SPR	Biacore 8K	SA	10mM HEPES pH 7.5, 150mM NaCl, 0.01% Tween 20, 2% DMSO	primary screen	LRRK2	25	30	30	15	3 injections of 50 mM NaOH for 60 sec each at 10 µL/min flow rate; 1 injection of protein for 50 sec at 10 µL/min flow rate to reach 7200-7400 RU; 1 injection of assay buffer without DMSO at 30 µL/min flow rate.	7236.07	47300	50	-0.19		Below	No	No	No	10.61																2022-08-05
1183	CACHE_1183_34	C1CCc2c(C1)c(C(NCc1ccc3CN(Cc3c1)C(c1c3CCCCc3n[nH]1)=O)=O)[nH]n2	Achiral|None|		SPR	Biacore 8K	SA	10mM HEPES pH 7.5, 150mM NaCl, 0.01% Tween 20, 2% DMSO	primary screen	LRRK2	25	30	30	15	3 injections of 50 mM NaOH for 60 sec each at 10 µL/min flow rate; 1 injection of protein for 50 sec at 10 µL/min flow rate to reach 7200-7400 RU; 1 injection of assay buffer without DMSO at 30 µL/min flow rate.	7061.69	47300	100	-2.97		Below	No	No	No	84.03																2022-08-05
1183	CACHE_1183_35	c1ccc2c(c1)C(Nc1ccc(cc1)C(Nc1cccc(c1)C(Nc1ccccn1)=O)=O)=NS2(=O)=O	Achiral|None|		SPR	Biacore 8K	SA	10mM HEPES pH 7.5, 150mM NaCl, 0.01% Tween 20, 2% DMSO	primary screen	LRRK2	25	30	30	15	3 injections of 50 mM NaOH for 60 sec each at 10 µL/min flow rate; 1 injection of protein for 50 sec at 10 µL/min flow rate to reach 7200-7400 RU; 1 injection of assay buffer without DMSO at 30 µL/min flow rate.	7294.16	47300	50	0.056		Below	No	No	No	0.39																2022-08-05
1183	CACHE_1183_35	c1ccc2c(c1)C(Nc1ccc(cc1)C(Nc1cccc(c1)C(Nc1ccccn1)=O)=O)=NS2(=O)=O	Achiral|None|		SPR	Biacore 8K	SA	10mM HEPES pH 7.5, 150mM NaCl, 0.01% Tween 20, 2% DMSO	primary screen	LRRK2	25	30	30	15	3 injections of 50 mM NaOH for 60 sec each at 10 µL/min flow rate; 1 injection of protein for 50 sec at 10 µL/min flow rate to reach 7200-7400 RU; 1 injection of assay buffer without DMSO at 30 µL/min flow rate.	7087.22	47300	100	0.083		Below	No	No	No	0.93																2022-08-05
1183	CACHE_1183_36	C1C=C(CN1C(c1ccc(Cn2cc(CO)nn2)cc1)=O)c1ccccc1F	Achiral|None|		SPR	Biacore 8K	SA	10mM HEPES pH 7.5, 150mM NaCl, 0.01% Tween 20, 2% DMSO	primary screen	LRRK2	25	30	30	15	3 injections of 50 mM NaOH for 60 sec each at 10 µL/min flow rate; 1 injection of protein for 50 sec at 10 µL/min flow rate to reach 7200-7400 RU; 1 injection of assay buffer without DMSO at 30 µL/min flow rate.	7338.46	47300	50	0.77		Above	No	Yes	No	0.36																2022-08-05
1183	CACHE_1183_36	C1C=C(CN1C(c1ccc(Cn2cc(CO)nn2)cc1)=O)c1ccccc1F	Achiral|None|		SPR	Biacore 8K	SA	10mM HEPES pH 7.5, 150mM NaCl, 0.01% Tween 20, 2% DMSO	primary screen	LRRK2	25	30	30	15	3 injections of 50 mM NaOH for 60 sec each at 10 µL/min flow rate; 1 injection of protein for 50 sec at 10 µL/min flow rate to reach 7200-7400 RU; 1 injection of assay buffer without DMSO at 30 µL/min flow rate.	7142.24	47300	100	1.67		Above	Yes	Yes	No	2.96																2022-08-05
1183	CACHE_1183_36	C1C=C(CN1C(c1ccc(Cn2cc(CO)nn2)cc1)=O)c1ccccc1F	Achiral|None|		SPR	Biacore 8K	SA	10mM HEPES pH 7.5, 150mM NaCl, 0.01% Tween 20, 2% DMSO	hit confirmation -dose response	LRRK2	25	30	60	120	3 injections of 50 mM NaOH for 60 sec each at 10 µL/min flow rate; 1 injection of protein for 50 sec at 10 µL/min flow rate to reach 6200-6700 RU; 1 injection of assay buffer without DMSO at 30 µL/min flow rate.	6582.03	47300									2.5	200	0.0015	NA	5.32	741.72	NA	Linear up to the highest concentration tested	6.06	-0.5	-1.81	0.14	1324.08		56.02	2022-11-22
1183	CACHE_1183_37	c1cc(cc(c1)NS(c1ccc(cc1)C(Nc1ccc(c(c1)NC(N)=O)F)=O)(=O)=O)C(F)(F)F	Achiral|None|		SPR	Biacore 8K	SA	10mM HEPES pH 7.5, 150mM NaCl, 0.01% Tween 20, 2% DMSO	primary screen	LRRK2	25	30	30	15	3 injections of 50 mM NaOH for 60 sec each at 10 µL/min flow rate; 1 injection of protein for 50 sec at 10 µL/min flow rate to reach 7200-7400 RU; 1 injection of assay buffer without DMSO at 30 µL/min flow rate.	7236.07	47300	50	0.0075		Below	No	No	No	0.039																2022-08-05
1183	CACHE_1183_37	c1cc(cc(c1)NS(c1ccc(cc1)C(Nc1ccc(c(c1)NC(N)=O)F)=O)(=O)=O)C(F)(F)F	Achiral|None|		SPR	Biacore 8K	SA	10mM HEPES pH 7.5, 150mM NaCl, 0.01% Tween 20, 2% DMSO	primary screen	LRRK2	25	30	30	15	3 injections of 50 mM NaOH for 60 sec each at 10 µL/min flow rate; 1 injection of protein for 50 sec at 10 µL/min flow rate to reach 7200-7400 RU; 1 injection of assay buffer without DMSO at 30 µL/min flow rate.	7061.69	47300	100	0.097		Below	No	No	No	0.41																2022-08-05
1183	CACHE_1183_4	Cc1nnnn1c1cc(ccc1F)NC(c1cc(c2ccccc2)nc2ccccc12)=O	Achiral|None|		SPR	Biacore 8K	SA	10mM HEPES pH 7.5, 150mM NaCl, 0.01% Tween 20, 2% DMSO	primary screen	LRRK2	25	30	30	15	3 injections of 50 mM NaOH for 60 sec each at 10 µL/min flow rate; 1 injection of protein for 50 sec at 10 µL/min flow rate to reach 7200-7400 RU; 1 injection of assay buffer without DMSO at 30 µL/min flow rate.	7336.49	47300	50	0.081		Below	No	No	No	0.42																2022-08-05
1183	CACHE_1183_4	Cc1nnnn1c1cc(ccc1F)NC(c1cc(c2ccccc2)nc2ccccc12)=O	Achiral|None|		SPR	Biacore 8K	SA	10mM HEPES pH 7.5, 150mM NaCl, 0.01% Tween 20, 2% DMSO	primary screen	LRRK2	25	30	30	15	3 injections of 50 mM NaOH for 60 sec each at 10 µL/min flow rate; 1 injection of protein for 50 sec at 10 µL/min flow rate to reach 7200-7400 RU; 1 injection of assay buffer without DMSO at 30 µL/min flow rate.	7141.26	47300	100	0.19		Below	No	No	No	1.19																2022-08-05
1183	CACHE_1183_5	COc1ccc(cc1OCc1ccc2ccccc2n1)NC(c1cnc(c2cnccn2)s1)=O	Achiral|None|		SPR	Biacore 8K	SA	10mM HEPES pH 7.5, 150mM NaCl, 0.01% Tween 20, 2% DMSO	primary screen	LRRK2	25	30	30	15	3 injections of 50 mM NaOH for 60 sec each at 10 µL/min flow rate; 1 injection of protein for 50 sec at 10 µL/min flow rate to reach 7200-7400 RU; 1 injection of assay buffer without DMSO at 30 µL/min flow rate.	7304.04	47300	50	0.09		Below	No	No	No	1.04																2022-08-05
1183	CACHE_1183_5	COc1ccc(cc1OCc1ccc2ccccc2n1)NC(c1cnc(c2cnccn2)s1)=O	Achiral|None|		SPR	Biacore 8K	SA	10mM HEPES pH 7.5, 150mM NaCl, 0.01% Tween 20, 2% DMSO	primary screen	LRRK2	25	30	30	15	3 injections of 50 mM NaOH for 60 sec each at 10 µL/min flow rate; 1 injection of protein for 50 sec at 10 µL/min flow rate to reach 7200-7400 RU; 1 injection of assay buffer without DMSO at 30 µL/min flow rate.	7108.03	47300	100	0.12		Below	No	No	No	1.88																2022-08-05
1183	CACHE_1183_6	CCNC(NCc1ccc(cc1)NC(c1cc(c2ccccc2)nc2ccccc12)=O)=O	Achiral|None|		SPR	Biacore 8K	SA	10mM HEPES pH 7.5, 150mM NaCl, 0.01% Tween 20, 2% DMSO	primary screen	LRRK2	25	30	30	15	3 injections of 50 mM NaOH for 60 sec each at 10 µL/min flow rate; 1 injection of protein for 50 sec at 10 µL/min flow rate to reach 7200-7400 RU; 1 injection of assay buffer without DMSO at 30 µL/min flow rate.	7295.64	47300	50	0.065		Below	No	No	No	0.067																2022-08-05
1183	CACHE_1183_6	CCNC(NCc1ccc(cc1)NC(c1cc(c2ccccc2)nc2ccccc12)=O)=O	Achiral|None|		SPR	Biacore 8K	SA	10mM HEPES pH 7.5, 150mM NaCl, 0.01% Tween 20, 2% DMSO	primary screen	LRRK2	25	30	30	15	3 injections of 50 mM NaOH for 60 sec each at 10 µL/min flow rate; 1 injection of protein for 50 sec at 10 µL/min flow rate to reach 7200-7400 RU; 1 injection of assay buffer without DMSO at 30 µL/min flow rate.	7057.4	47300	100	0.098		Below	No	No	No	0.61																2022-08-05
1183	CACHE_1183_7	C1CC1N1C(NC(c2cc(cnc12)c1nc(c2ccc(Cn3cnc4ccccc34)cc2)no1)=O)=O	Achiral|None|		SPR	Biacore 8K	SA	10mM HEPES pH 7.5, 150mM NaCl, 0.01% Tween 20, 2% DMSO	primary screen	LRRK2	25	30	30	15	3 injections of 50 mM NaOH for 60 sec each at 10 µL/min flow rate; 1 injection of protein for 50 sec at 10 µL/min flow rate to reach 7200-7400 RU; 1 injection of assay buffer without DMSO at 30 µL/min flow rate.	7322.2	47300	50	0.089		Below	No	No	No	0.44																2022-08-05
1183	CACHE_1183_7	C1CC1N1C(NC(c2cc(cnc12)c1nc(c2ccc(Cn3cnc4ccccc34)cc2)no1)=O)=O	Achiral|None|		SPR	Biacore 8K	SA	10mM HEPES pH 7.5, 150mM NaCl, 0.01% Tween 20, 2% DMSO	primary screen	LRRK2	25	30	30	15	3 injections of 50 mM NaOH for 60 sec each at 10 µL/min flow rate; 1 injection of protein for 50 sec at 10 µL/min flow rate to reach 7200-7400 RU; 1 injection of assay buffer without DMSO at 30 µL/min flow rate.	7084	47300	100	0.11		Below	No	No	No	0.49																2022-08-05
1183	CACHE_1183_8	Cc1c2c(cc(c3cccc(c3)C(F)(F)F)nc2on1)C(Nc1ccc2CC(Nc2c1)=O)=O	Achiral|None|		SPR	Biacore 8K	SA	10mM HEPES pH 7.5, 150mM NaCl, 0.01% Tween 20, 2% DMSO	primary screen	LRRK2	25	30	30	15	3 injections of 50 mM NaOH for 60 sec each at 10 µL/min flow rate; 1 injection of protein for 50 sec at 10 µL/min flow rate to reach 7200-7400 RU; 1 injection of assay buffer without DMSO at 30 µL/min flow rate.	7236.07	47300	50	0.00051		Below	No	No	No	0.13																2022-08-05
1183	CACHE_1183_8	Cc1c2c(cc(c3cccc(c3)C(F)(F)F)nc2on1)C(Nc1ccc2CC(Nc2c1)=O)=O	Achiral|None|		SPR	Biacore 8K	SA	10mM HEPES pH 7.5, 150mM NaCl, 0.01% Tween 20, 2% DMSO	primary screen	LRRK2	25	30	30	15	3 injections of 50 mM NaOH for 60 sec each at 10 µL/min flow rate; 1 injection of protein for 50 sec at 10 µL/min flow rate to reach 7200-7400 RU; 1 injection of assay buffer without DMSO at 30 µL/min flow rate.	7061.69	47300	100	0.13		Below	No	No	No	0.54																2022-08-05
1183	CACHE_1183_9	Cc1ccc(cc1C)c1c(cn(CCC#N)n1)C(Nc1ccc(c(c1)C(N)=O)F)=O	Achiral|None|		SPR	Biacore 8K	SA	10mM HEPES pH 7.5, 150mM NaCl, 0.01% Tween 20, 2% DMSO	primary screen	LRRK2	25	30	30	15	3 injections of 50 mM NaOH for 60 sec each at 10 µL/min flow rate; 1 injection of protein for 50 sec at 10 µL/min flow rate to reach 7200-7400 RU; 1 injection of assay buffer without DMSO at 30 µL/min flow rate.	7236.07	47300	50	0.24		Below	No	No	No	-0.35																2022-08-05
1183	CACHE_1183_9	Cc1ccc(cc1C)c1c(cn(CCC#N)n1)C(Nc1ccc(c(c1)C(N)=O)F)=O	Achiral|None|		SPR	Biacore 8K	SA	10mM HEPES pH 7.5, 150mM NaCl, 0.01% Tween 20, 2% DMSO	primary screen	LRRK2	25	30	30	15	3 injections of 50 mM NaOH for 60 sec each at 10 µL/min flow rate; 1 injection of protein for 50 sec at 10 µL/min flow rate to reach 7200-7400 RU; 1 injection of assay buffer without DMSO at 30 µL/min flow rate.	7061.69	47300	100	0.55		Below	No	No	No	-0.93																2022-08-05
1183	CACHE_1183_9	Cc1ccc(cc1C)c1c(cn(CCC#N)n1)C(Nc1ccc(c(c1)C(N)=O)F)=O	Achiral|None|		SPR	Biacore 8K	SA	10mM HEPES pH 7.5, 150mM NaCl, 0.01% Tween 20, 2% DMSO	hit confirmation -dose response	LRRK2	25	30	60	120	3 injections of 50 mM NaOH for 60 sec each at 10 µL/min flow rate; 1 injection of protein for 50 sec at 10 µL/min flow rate to reach 6200-6700 RU; 1 injection of assay buffer without DMSO at 30 µL/min flow rate.	6570.62	47300									2.5	200	NA	NA	NA	NA	NA	Without a dose respone	NA	NA	NA	NA	NA		55.92	2022-11-22
1183	CACHE-HO_1183_1	CNC(CNC(c1cccc(c1)NC(c1cn(Cc2ccccc2)c2ccccc12)=O)=O)=O	Achiral|None|		SPR	Biacore 8K	SA	10mM HEPES pH 7.5, 150mM NaCl, 0.01% Tween 20, 2% DMSO	primary screen	LRRK2	25	40	60	60	3 injections of 50 mM NaOH for 60 sec each at 10 µL/min flow rate; 1 injection of protein for 50 sec at 10 µL/min flow rate to reach 3900-4100 RU; 1 injection of assay buffer without DMSO at 30 µL/min flow rate.	4136.96	47300	50	1.13		Above	Yes	Yes	No	-10.28																2023-06-19
1183	CACHE-HO_1183_1	CNC(CNC(c1cccc(c1)NC(c1cn(Cc2ccccc2)c2ccccc12)=O)=O)=O	Achiral|None|		SPR	Biacore 8K	SA	10mM HEPES pH 7.5, 150mM NaCl, 0.01% Tween 20, 2% DMSO	primary screen	LRRK2	25	40	60	60	3 injections of 50 mM NaOH for 60 sec each at 10 µL/min flow rate; 1 injection of protein for 50 sec at 10 µL/min flow rate to reach 3900-4100 RU; 1 injection of assay buffer without DMSO at 30 µL/min flow rate.	4136.96	47300	50	0.41		Below	No	Yes	No	9.05																2023-06-19
1183	CACHE-HO_1183_10	Cc1cc(NC(c2cc(c3ccccc3)nc3c2cnn3Cc2cccnc2)=O)n[nH]1	Achiral|None|		SPR	Biacore 8K	SA	10mM HEPES pH 7.5, 150mM NaCl, 0.01% Tween 20, 2% DMSO	primary screen	LRRK2	25	40	60	60	3 injections of 50 mM NaOH for 60 sec each at 10 µL/min flow rate; 1 injection of protein for 50 sec at 10 µL/min flow rate to reach 3900-4100 RU; 1 injection of assay buffer without DMSO at 30 µL/min flow rate.	3945.67	47300	50	-0.0054		Below	No	No	No	6.52																2023-06-19
1183	CACHE-HO_1183_10	Cc1cc(NC(c2cc(c3ccccc3)nc3c2cnn3Cc2cccnc2)=O)n[nH]1	Achiral|None|		SPR	Biacore 8K	SA	10mM HEPES pH 7.5, 150mM NaCl, 0.01% Tween 20, 2% DMSO	primary screen	LRRK2	25	40	60	60	3 injections of 50 mM NaOH for 60 sec each at 10 µL/min flow rate; 1 injection of protein for 50 sec at 10 µL/min flow rate to reach 3900-4100 RU; 1 injection of assay buffer without DMSO at 30 µL/min flow rate.	3945.67	47300	50	0.11		Below	No	No	No	3.89																2023-06-19
1183	CACHE-HO_1183_11	C(c1ccccc1NC(c1cc(c2ccccc2)nc2c1cnn2Cc1cccnc1)=O)n1cncn1	Achiral|None|		SPR	Biacore 8K	SA	10mM HEPES pH 7.5, 150mM NaCl, 0.01% Tween 20, 2% DMSO	primary screen	LRRK2	25	40	60	60	3 injections of 50 mM NaOH for 60 sec each at 10 µL/min flow rate; 1 injection of protein for 50 sec at 10 µL/min flow rate to reach 3900-4100 RU; 1 injection of assay buffer without DMSO at 30 µL/min flow rate.	4144.61	47300	50	0.96		Above	No	No	No	4.66																2023-06-19
1183	CACHE-HO_1183_11	C(c1ccccc1NC(c1cc(c2ccccc2)nc2c1cnn2Cc1cccnc1)=O)n1cncn1	Achiral|None|		SPR	Biacore 8K	SA	10mM HEPES pH 7.5, 150mM NaCl, 0.01% Tween 20, 2% DMSO	primary screen	LRRK2	25	40	60	60	3 injections of 50 mM NaOH for 60 sec each at 10 µL/min flow rate; 1 injection of protein for 50 sec at 10 µL/min flow rate to reach 3900-4100 RU; 1 injection of assay buffer without DMSO at 30 µL/min flow rate.	4144.61	47300	50	11.53		Above	Yes	Yes	No	-291.23																2023-06-19
1183	CACHE-HO_1183_12	C(c1cccnc1)n1c2c(cn1)c(cc(c1ccccc1)n2)C(Nc1cn[nH]c1)=O	Achiral|None|		SPR	Biacore 8K	SA	10mM HEPES pH 7.5, 150mM NaCl, 0.01% Tween 20, 2% DMSO	primary screen	LRRK2	25	40	60	60	3 injections of 50 mM NaOH for 60 sec each at 10 µL/min flow rate; 1 injection of protein for 50 sec at 10 µL/min flow rate to reach 3900-4100 RU; 1 injection of assay buffer without DMSO at 30 µL/min flow rate.	4289.43	47300	50	2.05		Above	No	No	No	2.82																2023-06-19
1183	CACHE-HO_1183_12	C(c1cccnc1)n1c2c(cn1)c(cc(c1ccccc1)n2)C(Nc1cn[nH]c1)=O	Achiral|None|		SPR	Biacore 8K	SA	10mM HEPES pH 7.5, 150mM NaCl, 0.01% Tween 20, 2% DMSO	primary screen	LRRK2	25	40	60	60	3 injections of 50 mM NaOH for 60 sec each at 10 µL/min flow rate; 1 injection of protein for 50 sec at 10 µL/min flow rate to reach 3900-4100 RU; 1 injection of assay buffer without DMSO at 30 µL/min flow rate.	4289.43	47300	50	2.72		Above	No	No	No	0.58																2023-06-19
1183	CACHE-HO_1183_13	C1COCCN1c1ccccc1NC(c1cc(c2ccccc2)nc2c1cnn2Cc1cccnc1)=O	Achiral|None|		SPR	Biacore 8K	SA	10mM HEPES pH 7.5, 150mM NaCl, 0.01% Tween 20, 2% DMSO	primary screen	LRRK2	25	40	60	60	3 injections of 50 mM NaOH for 60 sec each at 10 µL/min flow rate; 1 injection of protein for 50 sec at 10 µL/min flow rate to reach 3900-4100 RU; 1 injection of assay buffer without DMSO at 30 µL/min flow rate.	4166.66	47300	50	0.89		Above	No	No	No	-0.12																2023-06-19		DSF	50mM HEPES pH7.5, 150mM NaCl, 2% DMSO	-2.6	-3	-3.9
1183	CACHE-HO_1183_13	C1COCCN1c1ccccc1NC(c1cc(c2ccccc2)nc2c1cnn2Cc1cccnc1)=O	Achiral|None|		SPR	Biacore 8K	SA	10mM HEPES pH 7.5, 150mM NaCl, 0.01% Tween 20, 2% DMSO	primary screen	LRRK2	25	40	60	60	3 injections of 50 mM NaOH for 60 sec each at 10 µL/min flow rate; 1 injection of protein for 50 sec at 10 µL/min flow rate to reach 3900-4100 RU; 1 injection of assay buffer without DMSO at 30 µL/min flow rate.	4166.66	47300	50	0.78		Above	No	No	No	4.1																2023-06-19		DSF	50mM HEPES pH7.5, 150mM NaCl, 2% DMSO	-2.6	-3	-3.9
1183	CACHE-HO_1183_13	C1COCCN1c1ccccc1NC(c1cc(c2ccccc2)nc2c1cnn2Cc1cccnc1)=O	Achiral|None|		SPR	Biacore 8K	SA	10mM HEPES pH 7.5, 150mM NaCl, 0.01% Tween 20, 2% DMSO	hit confirmation -dose response	LRRK2	25	40	60	120	3 injections of 50 mM NaOH for 60 sec each at 10 µL/min flow rate; 1 injection of protein for 50 sec at 10 µL/min flow rate to reach 4200-4600 RU; 1 injection of assay buffer without DMSO at 30 µL/min flow rate.	4506	47300									2.5	200	4.8E-6	4.76E-06	1.66	19.04	17.4		4.57	-2.85	-0.63	1.04	40.46	36.966221	47.07	2023-07-10		DSF	50mM HEPES pH7.5, 150mM NaCl, 2% DMSO	-2.6	-3	-3.9
1183	CACHE-HO_1183_14	Cc1nc(c2ccccc2NC(c2cc(c3ccccc3)nc3c2cnn3Cc2cccnc2)=O)[nH]n1	Achiral|None|		SPR	Biacore 8K	SA	10mM HEPES pH 7.5, 150mM NaCl, 0.01% Tween 20, 2% DMSO	primary screen	LRRK2	25	40	60	60	3 injections of 50 mM NaOH for 60 sec each at 10 µL/min flow rate; 1 injection of protein for 50 sec at 10 µL/min flow rate to reach 3900-4100 RU; 1 injection of assay buffer without DMSO at 30 µL/min flow rate.	4062.55	47300	50	-0.13		Below	No	No	No	6.51																2023-06-19
1183	CACHE-HO_1183_14	Cc1nc(c2ccccc2NC(c2cc(c3ccccc3)nc3c2cnn3Cc2cccnc2)=O)[nH]n1	Achiral|None|		SPR	Biacore 8K	SA	10mM HEPES pH 7.5, 150mM NaCl, 0.01% Tween 20, 2% DMSO	primary screen	LRRK2	25	40	60	60	3 injections of 50 mM NaOH for 60 sec each at 10 µL/min flow rate; 1 injection of protein for 50 sec at 10 µL/min flow rate to reach 3900-4100 RU; 1 injection of assay buffer without DMSO at 30 µL/min flow rate.	4062.55	47300	50	0.16		Below	No	No	No	4.76																2023-06-19
1183	CACHE-HO_1183_16	C(c1cccnc1)n1c2c(cn1)c(cc(c1ccccc1)n2)C(Nc1nncs1)=O	Achiral|None|		SPR	Biacore 8K	SA	10mM HEPES pH 7.5, 150mM NaCl, 0.01% Tween 20, 2% DMSO	primary screen	LRRK2	25	40	60	60	3 injections of 50 mM NaOH for 60 sec each at 10 µL/min flow rate; 1 injection of protein for 50 sec at 10 µL/min flow rate to reach 3900-4100 RU; 1 injection of assay buffer without DMSO at 30 µL/min flow rate.	4144.61	47300	50	0.59		Above	No	No	No	5.04																2023-06-19		DSF	50mM HEPES pH7.5, 150mM NaCl, 2% DMSO	0	-0.2	-0.2
1183	CACHE-HO_1183_16	C(c1cccnc1)n1c2c(cn1)c(cc(c1ccccc1)n2)C(Nc1nncs1)=O	Achiral|None|		SPR	Biacore 8K	SA	10mM HEPES pH 7.5, 150mM NaCl, 0.01% Tween 20, 2% DMSO	primary screen	LRRK2	25	40	60	60	3 injections of 50 mM NaOH for 60 sec each at 10 µL/min flow rate; 1 injection of protein for 50 sec at 10 µL/min flow rate to reach 3900-4100 RU; 1 injection of assay buffer without DMSO at 30 µL/min flow rate.	4144.61	47300	50	0.79		Above	No	No	No	2.55																2023-06-19		DSF	50mM HEPES pH7.5, 150mM NaCl, 2% DMSO	0	-0.2	-0.2
1183	CACHE-HO_1183_16	C(c1cccnc1)n1c2c(cn1)c(cc(c1ccccc1)n2)C(Nc1nncs1)=O	Achiral|None|		SPR	Biacore 8K	SA	10mM HEPES pH 7.5, 150mM NaCl, 0.01% Tween 20, 2% DMSO	hit confirmation -dose response	LRRK2	25	40	60	120	3 injections of 50 mM NaOH for 60 sec each at 10 µL/min flow rate; 1 injection of protein for 50 sec at 10 µL/min flow rate to reach 4200-4600 RU; 1 injection of assay buffer without DMSO at 30 µL/min flow rate.	4324.24	47300									2.5	200	3.1E-6	3.14E-06	0.5	20.22	11.8		1.11	-7.17	-0.37	6.93	53.21	31.052632	38	2023-07-10		DSF	50mM HEPES pH7.5, 150mM NaCl, 2% DMSO	0	-0.2	-0.2
1183	CACHE-HO_1183_17	C(c1cccnc1)n1c2c(cn1)c(cc(c1ccccc1)n2)C(Nc1nnc(c2ccco2)s1)=O	Achiral|None|		SPR	Biacore 8K	SA	10mM HEPES pH 7.5, 150mM NaCl, 0.01% Tween 20, 2% DMSO	primary screen	LRRK2	25	40	60	60	3 injections of 50 mM NaOH for 60 sec each at 10 µL/min flow rate; 1 injection of protein for 50 sec at 10 µL/min flow rate to reach 3900-4100 RU; 1 injection of assay buffer without DMSO at 30 µL/min flow rate.	3945.67	47300	50	0.046		Below	No	No	No	7.82																2023-06-19
1183	CACHE-HO_1183_17	C(c1cccnc1)n1c2c(cn1)c(cc(c1ccccc1)n2)C(Nc1nnc(c2ccco2)s1)=O	Achiral|None|		SPR	Biacore 8K	SA	10mM HEPES pH 7.5, 150mM NaCl, 0.01% Tween 20, 2% DMSO	primary screen	LRRK2	25	40	60	60	3 injections of 50 mM NaOH for 60 sec each at 10 µL/min flow rate; 1 injection of protein for 50 sec at 10 µL/min flow rate to reach 3900-4100 RU; 1 injection of assay buffer without DMSO at 30 µL/min flow rate.	3945.67	47300	50	0.13		Below	No	No	No	4.3																2023-06-19
1183	CACHE-HO_1183_18	Cc1c(cccc1S(N)(=O)=O)NC(c1cc(c2ccccc2)nc2c1cnn2Cc1cccnc1)=O	Achiral|None|		SPR	Biacore 8K	SA	10mM HEPES pH 7.5, 150mM NaCl, 0.01% Tween 20, 2% DMSO	primary screen	LRRK2	25	40	60	60	3 injections of 50 mM NaOH for 60 sec each at 10 µL/min flow rate; 1 injection of protein for 50 sec at 10 µL/min flow rate to reach 3900-4100 RU; 1 injection of assay buffer without DMSO at 30 µL/min flow rate.	4289.43	47300	50	0.26		Below	No	No	No	4.71																2023-06-19
1183	CACHE-HO_1183_18	Cc1c(cccc1S(N)(=O)=O)NC(c1cc(c2ccccc2)nc2c1cnn2Cc1cccnc1)=O	Achiral|None|		SPR	Biacore 8K	SA	10mM HEPES pH 7.5, 150mM NaCl, 0.01% Tween 20, 2% DMSO	primary screen	LRRK2	25	40	60	60	3 injections of 50 mM NaOH for 60 sec each at 10 µL/min flow rate; 1 injection of protein for 50 sec at 10 µL/min flow rate to reach 3900-4100 RU; 1 injection of assay buffer without DMSO at 30 µL/min flow rate.	4289.43	47300	50	0.43		Below	No	No	No	3.08																2023-06-19
1183	CACHE-HO_1183_18	Cc1c(cccc1S(N)(=O)=O)NC(c1cc(c2ccccc2)nc2c1cnn2Cc1cccnc1)=O	Achiral|None|		SPR	Biacore 8K	SA	10mM HEPES pH 7.5, 150mM NaCl, 0.01% Tween 20, 2% DMSO	hit confirmation -dose response	LRRK2	25	40	60	120	3 injections of 50 mM NaOH for 60 sec each at 10 µL/min flow rate; 1 injection of protein for 50 sec at 10 µL/min flow rate to reach 4200-4600 RU; 1 injection of assay buffer without DMSO at 30 µL/min flow rate.	4376.23	47300									2.5	200	2.09	NA	0.016	26614.72	NA	Linear up to the highest concentration tested	0.016	0.32	0.29	3.77	57282.16		46.46	2023-07-10
1183	CACHE-HO_1183_19	C1COCCN1c1c(cccn1)NC(c1cc(c2ccccc2)nc2c1cnn2Cc1cccnc1)=O	Achiral|None|		SPR	Biacore 8K	SA	10mM HEPES pH 7.5, 150mM NaCl, 0.01% Tween 20, 2% DMSO	primary screen	LRRK2	25	40	60	60	3 injections of 50 mM NaOH for 60 sec each at 10 µL/min flow rate; 1 injection of protein for 50 sec at 10 µL/min flow rate to reach 3900-4100 RU; 1 injection of assay buffer without DMSO at 30 µL/min flow rate.	4144.61	47300	50	1.51		Above	No	Yes	No	7.37																2023-06-19		DSF	50mM HEPES pH7.5, 150mM NaCl, 2% DMSO	0.7	1.1	-11.7	Bad curve at 500µM
1183	CACHE-HO_1183_19	C1COCCN1c1c(cccn1)NC(c1cc(c2ccccc2)nc2c1cnn2Cc1cccnc1)=O	Achiral|None|		SPR	Biacore 8K	SA	10mM HEPES pH 7.5, 150mM NaCl, 0.01% Tween 20, 2% DMSO	primary screen	LRRK2	25	40	60	60	3 injections of 50 mM NaOH for 60 sec each at 10 µL/min flow rate; 1 injection of protein for 50 sec at 10 µL/min flow rate to reach 3900-4100 RU; 1 injection of assay buffer without DMSO at 30 µL/min flow rate.	4144.61	47300	50	1.81		Above	No	No	No	5.79																2023-06-19		DSF	50mM HEPES pH7.5, 150mM NaCl, 2% DMSO	0.7	1.1	-11.7	Bad curve at 500µM
1183	CACHE-HO_1183_19	C1COCCN1c1c(cccn1)NC(c1cc(c2ccccc2)nc2c1cnn2Cc1cccnc1)=O	Achiral|None|		SPR	Biacore 8K	SA	10mM HEPES pH 7.5, 150mM NaCl, 0.01% Tween 20, 2% DMSO	hit confirmation -dose response	LRRK2	25	40	60	120	3 injections of 50 mM NaOH for 60 sec each at 10 µL/min flow rate; 1 injection of protein for 50 sec at 10 µL/min flow rate to reach 4200-4600 RU; 1 injection of assay buffer without DMSO at 30 µL/min flow rate.	4376.23	47300									2.5	200	1.8E-5	1.76E-05	5.42	38.99	37		25.46	2.05	1.27	0.99	85.11	80.768391	45.81	2023-07-10		DSF	50mM HEPES pH7.5, 150mM NaCl, 2% DMSO	0.7	1.1	-11.7	Bad curve at 500µM
1183	CACHE-HO_1183_2	Cc1ccc2c(c1)c(cc(C1CC1)n2)C(Nc1cccc(c1)C(N(C)CC(N)=O)=O)=O	Achiral|None|		SPR	Biacore 8K	SA	10mM HEPES pH 7.5, 150mM NaCl, 0.01% Tween 20, 2% DMSO	primary screen	LRRK2	25	40	60	60	3 injections of 50 mM NaOH for 60 sec each at 10 µL/min flow rate; 1 injection of protein for 50 sec at 10 µL/min flow rate to reach 3900-4100 RU; 1 injection of assay buffer without DMSO at 30 µL/min flow rate.	4144.61	47300	50	0.32		Below	No	No	No	2.39																2023-06-19
1183	CACHE-HO_1183_2	Cc1ccc2c(c1)c(cc(C1CC1)n2)C(Nc1cccc(c1)C(N(C)CC(N)=O)=O)=O	Achiral|None|		SPR	Biacore 8K	SA	10mM HEPES pH 7.5, 150mM NaCl, 0.01% Tween 20, 2% DMSO	primary screen	LRRK2	25	40	60	60	3 injections of 50 mM NaOH for 60 sec each at 10 µL/min flow rate; 1 injection of protein for 50 sec at 10 µL/min flow rate to reach 3900-4100 RU; 1 injection of assay buffer without DMSO at 30 µL/min flow rate.	4144.61	47300	50	0.24		Below	No	No	No	4.16																2023-06-19
1183	CACHE-HO_1183_20	C(c1cccc(c1)F)n1c2c(cn1)c(cc(c1ccccc1)n2)C(Nc1cccnc1C(N)=O)=O	Achiral|None|		SPR	Biacore 8K	SA	10mM HEPES pH 7.5, 150mM NaCl, 0.01% Tween 20, 2% DMSO	primary screen	LRRK2	25	40	60	60	3 injections of 50 mM NaOH for 60 sec each at 10 µL/min flow rate; 1 injection of protein for 50 sec at 10 µL/min flow rate to reach 3900-4100 RU; 1 injection of assay buffer without DMSO at 30 µL/min flow rate.	3945.67	47300	50	-0.14		Below	No	No	No	6.74																2023-06-19
1183	CACHE-HO_1183_20	C(c1cccc(c1)F)n1c2c(cn1)c(cc(c1ccccc1)n2)C(Nc1cccnc1C(N)=O)=O	Achiral|None|		SPR	Biacore 8K	SA	10mM HEPES pH 7.5, 150mM NaCl, 0.01% Tween 20, 2% DMSO	primary screen	LRRK2	25	40	60	60	3 injections of 50 mM NaOH for 60 sec each at 10 µL/min flow rate; 1 injection of protein for 50 sec at 10 µL/min flow rate to reach 3900-4100 RU; 1 injection of assay buffer without DMSO at 30 µL/min flow rate.	3945.67	47300	50	-0.036		Below	No	No	No	4.5																2023-06-19
1183	CACHE-HO_1183_21	Cc1cc(NC(c2cc(c3ccccc3)nc3c2cnn3Cc2cccnc2)=O)no1	Achiral|None|		SPR	Biacore 8K	SA	10mM HEPES pH 7.5, 150mM NaCl, 0.01% Tween 20, 2% DMSO	primary screen	LRRK2	25	40	60	60	3 injections of 50 mM NaOH for 60 sec each at 10 µL/min flow rate; 1 injection of protein for 50 sec at 10 µL/min flow rate to reach 3900-4100 RU; 1 injection of assay buffer without DMSO at 30 µL/min flow rate.	4144.61	47300	50	0.2		Below	No	No	No	7.5																2023-06-19
1183	CACHE-HO_1183_21	Cc1cc(NC(c2cc(c3ccccc3)nc3c2cnn3Cc2cccnc2)=O)no1	Achiral|None|		SPR	Biacore 8K	SA	10mM HEPES pH 7.5, 150mM NaCl, 0.01% Tween 20, 2% DMSO	primary screen	LRRK2	25	40	60	60	3 injections of 50 mM NaOH for 60 sec each at 10 µL/min flow rate; 1 injection of protein for 50 sec at 10 µL/min flow rate to reach 3900-4100 RU; 1 injection of assay buffer without DMSO at 30 µL/min flow rate.	4144.61	47300	50	0.37		Below	No	No	No	5.01																2023-06-19
1183	CACHE-HO_1183_22	Cc1c2c(cc(c3ccc(cc3)OC)nc2n(c2ccccc2)n1)C(Nc1ncc(C(N)=O)s1)=O	Achiral|None|		SPR	Biacore 8K	SA	10mM HEPES pH 7.5, 150mM NaCl, 0.01% Tween 20, 2% DMSO	primary screen	LRRK2	25	40	60	60	3 injections of 50 mM NaOH for 60 sec each at 10 µL/min flow rate; 1 injection of protein for 50 sec at 10 µL/min flow rate to reach 3900-4100 RU; 1 injection of assay buffer without DMSO at 30 µL/min flow rate.	4144.61	47300	50	0.27		Below	No	No	No	5.54																2023-06-19
1183	CACHE-HO_1183_22	Cc1c2c(cc(c3ccc(cc3)OC)nc2n(c2ccccc2)n1)C(Nc1ncc(C(N)=O)s1)=O	Achiral|None|		SPR	Biacore 8K	SA	10mM HEPES pH 7.5, 150mM NaCl, 0.01% Tween 20, 2% DMSO	primary screen	LRRK2	25	40	60	60	3 injections of 50 mM NaOH for 60 sec each at 10 µL/min flow rate; 1 injection of protein for 50 sec at 10 µL/min flow rate to reach 3900-4100 RU; 1 injection of assay buffer without DMSO at 30 µL/min flow rate.	4144.61	47300	50	0.31		Below	No	No	No	3.36																2023-06-19
1183	CACHE-HO_1183_23	C1COC(N1c1cccc(c1)NC(c1cc(c2ccccc2)nc2c1cnn2Cc1cccnc1)=O)=O	Achiral|None|		SPR	Biacore 8K	SA	10mM HEPES pH 7.5, 150mM NaCl, 0.01% Tween 20, 2% DMSO	primary screen	LRRK2	25	40	60	60	3 injections of 50 mM NaOH for 60 sec each at 10 µL/min flow rate; 1 injection of protein for 50 sec at 10 µL/min flow rate to reach 3900-4100 RU; 1 injection of assay buffer without DMSO at 30 µL/min flow rate.	4166.66	47300	50	0.032		Below	No	No	No	3.98																2023-06-19
1183	CACHE-HO_1183_23	C1COC(N1c1cccc(c1)NC(c1cc(c2ccccc2)nc2c1cnn2Cc1cccnc1)=O)=O	Achiral|None|		SPR	Biacore 8K	SA	10mM HEPES pH 7.5, 150mM NaCl, 0.01% Tween 20, 2% DMSO	primary screen	LRRK2	25	40	60	60	3 injections of 50 mM NaOH for 60 sec each at 10 µL/min flow rate; 1 injection of protein for 50 sec at 10 µL/min flow rate to reach 3900-4100 RU; 1 injection of assay buffer without DMSO at 30 µL/min flow rate.	4166.66	47300	50	0.081		Below	No	No	No	4.17																2023-06-19
1183	CACHE-HO_1183_24	C(c1cccnc1)n1c2c(cn1)c(cc(c1ccccc1)n2)C(Nc1nnc(c2ccccc2)o1)=O	Achiral|None|		SPR	Biacore 8K	SA	10mM HEPES pH 7.5, 150mM NaCl, 0.01% Tween 20, 2% DMSO	primary screen	LRRK2	25	40	60	60	3 injections of 50 mM NaOH for 60 sec each at 10 µL/min flow rate; 1 injection of protein for 50 sec at 10 µL/min flow rate to reach 3900-4100 RU; 1 injection of assay buffer without DMSO at 30 µL/min flow rate.	4102.53	47300	50	9.53		Above	Yes	Yes	Yes	6.22																2023-06-19
1183	CACHE-HO_1183_24	C(c1cccnc1)n1c2c(cn1)c(cc(c1ccccc1)n2)C(Nc1nnc(c2ccccc2)o1)=O	Achiral|None|		SPR	Biacore 8K	SA	10mM HEPES pH 7.5, 150mM NaCl, 0.01% Tween 20, 2% DMSO	primary screen	LRRK2	25	40	60	60	3 injections of 50 mM NaOH for 60 sec each at 10 µL/min flow rate; 1 injection of protein for 50 sec at 10 µL/min flow rate to reach 3900-4100 RU; 1 injection of assay buffer without DMSO at 30 µL/min flow rate.	4102.53	47300	50	8.86		Above	Yes	Yes	Yes	3.85																2023-06-19
1183	CACHE-HO_1183_25	C(c1cccnc1)n1c2c(cn1)c(cc(c1ccccc1)n2)C(Nc1cccc(c1)n1cnnn1)=O	Achiral|None|		SPR	Biacore 8K	SA	10mM HEPES pH 7.5, 150mM NaCl, 0.01% Tween 20, 2% DMSO	primary screen	LRRK2	25	40	60	60	3 injections of 50 mM NaOH for 60 sec each at 10 µL/min flow rate; 1 injection of protein for 50 sec at 10 µL/min flow rate to reach 3900-4100 RU; 1 injection of assay buffer without DMSO at 30 µL/min flow rate.	4166.66	47300	50	0.18		Below	No	No	No	10.69																2023-06-19
1183	CACHE-HO_1183_25	C(c1cccnc1)n1c2c(cn1)c(cc(c1ccccc1)n2)C(Nc1cccc(c1)n1cnnn1)=O	Achiral|None|		SPR	Biacore 8K	SA	10mM HEPES pH 7.5, 150mM NaCl, 0.01% Tween 20, 2% DMSO	primary screen	LRRK2	25	40	60	60	3 injections of 50 mM NaOH for 60 sec each at 10 µL/min flow rate; 1 injection of protein for 50 sec at 10 µL/min flow rate to reach 3900-4100 RU; 1 injection of assay buffer without DMSO at 30 µL/min flow rate.	4166.66	47300	50	0.15		Below	No	No	No	10.43																2023-06-19
1183	CACHE-HO_1183_26	C1CC1NC(c1ccccc1NC(c1cc(c2ccccc2)nc2c1cnn2Cc1cccnc1)=O)=O	Achiral|None|		SPR	Biacore 8K	SA	10mM HEPES pH 7.5, 150mM NaCl, 0.01% Tween 20, 2% DMSO	primary screen	LRRK2	25	40	60	60	3 injections of 50 mM NaOH for 60 sec each at 10 µL/min flow rate; 1 injection of protein for 50 sec at 10 µL/min flow rate to reach 3900-4100 RU; 1 injection of assay buffer without DMSO at 30 µL/min flow rate.	3945.48	47300	50	-0.13		Below	No	No	No	4.52																2023-06-19
1183	CACHE-HO_1183_26	C1CC1NC(c1ccccc1NC(c1cc(c2ccccc2)nc2c1cnn2Cc1cccnc1)=O)=O	Achiral|None|		SPR	Biacore 8K	SA	10mM HEPES pH 7.5, 150mM NaCl, 0.01% Tween 20, 2% DMSO	primary screen	LRRK2	25	40	60	60	3 injections of 50 mM NaOH for 60 sec each at 10 µL/min flow rate; 1 injection of protein for 50 sec at 10 µL/min flow rate to reach 3900-4100 RU; 1 injection of assay buffer without DMSO at 30 µL/min flow rate.	3945.48	47300	50	0.18		Below	No	No	No	2.8																2023-06-19
1183	CACHE-HO_1183_27	COC(c1c(ccs1)NC(c1cc(c2ccccc2)nc2c1cnn2Cc1cccnc1)=O)=O	Achiral|None|		SPR	Biacore 8K	SA	10mM HEPES pH 7.5, 150mM NaCl, 0.01% Tween 20, 2% DMSO	primary screen	LRRK2	25	40	60	60	3 injections of 50 mM NaOH for 60 sec each at 10 µL/min flow rate; 1 injection of protein for 50 sec at 10 µL/min flow rate to reach 3900-4100 RU; 1 injection of assay buffer without DMSO at 30 µL/min flow rate.	4166.66	47300	50	0.36		Below	No	No	No	7.7																2023-06-19
1183	CACHE-HO_1183_27	COC(c1c(ccs1)NC(c1cc(c2ccccc2)nc2c1cnn2Cc1cccnc1)=O)=O	Achiral|None|		SPR	Biacore 8K	SA	10mM HEPES pH 7.5, 150mM NaCl, 0.01% Tween 20, 2% DMSO	primary screen	LRRK2	25	40	60	60	3 injections of 50 mM NaOH for 60 sec each at 10 µL/min flow rate; 1 injection of protein for 50 sec at 10 µL/min flow rate to reach 3900-4100 RU; 1 injection of assay buffer without DMSO at 30 µL/min flow rate.	4166.66	47300	50	0.33		Below	No	No	No	7.08																2023-06-19
1183	CACHE-HO_1183_28	C(c1cccnc1)n1c2c(cn1)c(cc(c1ccccc1)n2)C(Nc1ccc2nncn2c1)=O	Achiral|None|		SPR	Biacore 8K	SA	10mM HEPES pH 7.5, 150mM NaCl, 0.01% Tween 20, 2% DMSO	primary screen	LRRK2	25	40	60	60	3 injections of 50 mM NaOH for 60 sec each at 10 µL/min flow rate; 1 injection of protein for 50 sec at 10 µL/min flow rate to reach 3900-4100 RU; 1 injection of assay buffer without DMSO at 30 µL/min flow rate.	4289.43	47300	50	0.11		Below	No	No	No	6.02																2023-06-19
1183	CACHE-HO_1183_28	C(c1cccnc1)n1c2c(cn1)c(cc(c1ccccc1)n2)C(Nc1ccc2nncn2c1)=O	Achiral|None|		SPR	Biacore 8K	SA	10mM HEPES pH 7.5, 150mM NaCl, 0.01% Tween 20, 2% DMSO	primary screen	LRRK2	25	40	60	60	3 injections of 50 mM NaOH for 60 sec each at 10 µL/min flow rate; 1 injection of protein for 50 sec at 10 µL/min flow rate to reach 3900-4100 RU; 1 injection of assay buffer without DMSO at 30 µL/min flow rate.	4289.43	47300	50	0.36		Below	No	No	No	3.61																2023-06-19
1183	CACHE-HO_1183_29	CS(c1ccccc1NC(c1cc(c2ccccc2)nc2c1cnn2Cc1cccnc1)=O)(=O)=O	Achiral|None|		SPR	Biacore 8K	SA	10mM HEPES pH 7.5, 150mM NaCl, 0.01% Tween 20, 2% DMSO	primary screen	LRRK2	25	40	60	60	3 injections of 50 mM NaOH for 60 sec each at 10 µL/min flow rate; 1 injection of protein for 50 sec at 10 µL/min flow rate to reach 3900-4100 RU; 1 injection of assay buffer without DMSO at 30 µL/min flow rate.	4136.96	47300	50	0.11		Below	No	No	No	1.41																2023-06-19
1183	CACHE-HO_1183_29	CS(c1ccccc1NC(c1cc(c2ccccc2)nc2c1cnn2Cc1cccnc1)=O)(=O)=O	Achiral|None|		SPR	Biacore 8K	SA	10mM HEPES pH 7.5, 150mM NaCl, 0.01% Tween 20, 2% DMSO	primary screen	LRRK2	25	40	60	60	3 injections of 50 mM NaOH for 60 sec each at 10 µL/min flow rate; 1 injection of protein for 50 sec at 10 µL/min flow rate to reach 3900-4100 RU; 1 injection of assay buffer without DMSO at 30 µL/min flow rate.	4136.96	47300	50	0.092		Below	No	No	No	3.82																2023-06-19
1183	CACHE-HO_1183_3	Cc1c(ccc(c2cccs2)n1)C(Nc1cccc(c1)C(N(C)CC(N)=O)=O)=O	Achiral|None|		SPR	Biacore 8K	SA	10mM HEPES pH 7.5, 150mM NaCl, 0.01% Tween 20, 2% DMSO	primary screen	LRRK2	25	40	60	60	3 injections of 50 mM NaOH for 60 sec each at 10 µL/min flow rate; 1 injection of protein for 50 sec at 10 µL/min flow rate to reach 3900-4100 RU; 1 injection of assay buffer without DMSO at 30 µL/min flow rate.	4136.96	47300	50	0.32		Below	No	No	No	4.54																2023-06-19
1183	CACHE-HO_1183_3	Cc1c(ccc(c2cccs2)n1)C(Nc1cccc(c1)C(N(C)CC(N)=O)=O)=O	Achiral|None|		SPR	Biacore 8K	SA	10mM HEPES pH 7.5, 150mM NaCl, 0.01% Tween 20, 2% DMSO	primary screen	LRRK2	25	40	60	60	3 injections of 50 mM NaOH for 60 sec each at 10 µL/min flow rate; 1 injection of protein for 50 sec at 10 µL/min flow rate to reach 3900-4100 RU; 1 injection of assay buffer without DMSO at 30 µL/min flow rate.	4136.96	47300	50	0.46		Below	No	No	No	3.48																2023-06-19
1183	CACHE-HO_1183_3	Cc1c(ccc(c2cccs2)n1)C(Nc1cccc(c1)C(N(C)CC(N)=O)=O)=O	Achiral|None|		SPR	Biacore 8K	SA	10mM HEPES pH 7.5, 150mM NaCl, 0.01% Tween 20, 2% DMSO	hit confirmation -dose response	LRRK2	25	40	60	120	3 injections of 50 mM NaOH for 60 sec each at 10 µL/min flow rate; 1 injection of protein for 50 sec at 10 µL/min flow rate to reach 4200-4600 RU; 1 injection of assay buffer without DMSO at 30 µL/min flow rate.	4248.73	47300									2.5	200	10.28	NA	0.0089	902950.05	NA	Linear up to the highest concentration tested	0.0089	0.18	0.5	0.4	2448171.7		36.88	2023-07-10
1183	CACHE-HO_1183_30	Cn1cnc(NC(c2cc(c3ccccc3)nc3c2cnn3Cc2cccnc2)=O)n1	Achiral|None|		SPR	Biacore 8K	SA	10mM HEPES pH 7.5, 150mM NaCl, 0.01% Tween 20, 2% DMSO	primary screen	LRRK2	25	40	60	60	3 injections of 50 mM NaOH for 60 sec each at 10 µL/min flow rate; 1 injection of protein for 50 sec at 10 µL/min flow rate to reach 3900-4100 RU; 1 injection of assay buffer without DMSO at 30 µL/min flow rate.	3945.67	47300	50	0.51		Below	No	No	No	4.77																2023-06-19
1183	CACHE-HO_1183_30	Cn1cnc(NC(c2cc(c3ccccc3)nc3c2cnn3Cc2cccnc2)=O)n1	Achiral|None|		SPR	Biacore 8K	SA	10mM HEPES pH 7.5, 150mM NaCl, 0.01% Tween 20, 2% DMSO	primary screen	LRRK2	25	40	60	60	3 injections of 50 mM NaOH for 60 sec each at 10 µL/min flow rate; 1 injection of protein for 50 sec at 10 µL/min flow rate to reach 3900-4100 RU; 1 injection of assay buffer without DMSO at 30 µL/min flow rate.	3945.67	47300	50	0.94		Above	No	No	No	2.32																2023-06-19
1183	CACHE-HO_1183_30	Cn1cnc(NC(c2cc(c3ccccc3)nc3c2cnn3Cc2cccnc2)=O)n1	Achiral|None|		SPR	Biacore 8K	SA	10mM HEPES pH 7.5, 150mM NaCl, 0.01% Tween 20, 2% DMSO	hit confirmation -dose response	LRRK2	25	40	60	120	3 injections of 50 mM NaOH for 60 sec each at 10 µL/min flow rate; 1 injection of protein for 50 sec at 10 µL/min flow rate to reach 4200-4600 RU; 1 injection of assay buffer without DMSO at 30 µL/min flow rate.	4376.23	47300									2.5	200	1.84	NA	0.37	422993.09	NA	Linear up to the highest concentration tested	0.37	-0.73	-4.6	0.077	1108019.62		38.18	2023-07-10
1183	CACHE-HO_1183_31	C(c1cccc(c1)F)n1c2c(cn1)c(cc(c1ccccc1)n2)C(NN1C=NNC1=O)=O	Achiral|None|		SPR	Biacore 8K	SA	10mM HEPES pH 7.5, 150mM NaCl, 0.01% Tween 20, 2% DMSO	primary screen	LRRK2	25	40	60	60	3 injections of 50 mM NaOH for 60 sec each at 10 µL/min flow rate; 1 injection of protein for 50 sec at 10 µL/min flow rate to reach 3900-4100 RU; 1 injection of assay buffer without DMSO at 30 µL/min flow rate.	3945.48	47300	50	0.056		Below	No	No	No	2.87																2023-06-19
1183	CACHE-HO_1183_31	C(c1cccc(c1)F)n1c2c(cn1)c(cc(c1ccccc1)n2)C(NN1C=NNC1=O)=O	Achiral|None|		SPR	Biacore 8K	SA	10mM HEPES pH 7.5, 150mM NaCl, 0.01% Tween 20, 2% DMSO	primary screen	LRRK2	25	40	60	60	3 injections of 50 mM NaOH for 60 sec each at 10 µL/min flow rate; 1 injection of protein for 50 sec at 10 µL/min flow rate to reach 3900-4100 RU; 1 injection of assay buffer without DMSO at 30 µL/min flow rate.	3945.48	47300	50	0.2		Below	No	No	No	1.56																2023-06-19
1183	CACHE-HO_1183_32	C=CCNC(c1ccccc1NC(c1cc(c2ccccc2)nc2c1cnn2Cc1cccnc1)=O)=O	Achiral|None|		SPR	Biacore 8K	SA	10mM HEPES pH 7.5, 150mM NaCl, 0.01% Tween 20, 2% DMSO	primary screen	LRRK2	25	40	60	60	3 injections of 50 mM NaOH for 60 sec each at 10 µL/min flow rate; 1 injection of protein for 50 sec at 10 µL/min flow rate to reach 3900-4100 RU; 1 injection of assay buffer without DMSO at 30 µL/min flow rate.	4289.43	47300	50	0.056		Below	No	No	No	5.6																2023-06-19
1183	CACHE-HO_1183_32	C=CCNC(c1ccccc1NC(c1cc(c2ccccc2)nc2c1cnn2Cc1cccnc1)=O)=O	Achiral|None|		SPR	Biacore 8K	SA	10mM HEPES pH 7.5, 150mM NaCl, 0.01% Tween 20, 2% DMSO	primary screen	LRRK2	25	40	60	60	3 injections of 50 mM NaOH for 60 sec each at 10 µL/min flow rate; 1 injection of protein for 50 sec at 10 µL/min flow rate to reach 3900-4100 RU; 1 injection of assay buffer without DMSO at 30 µL/min flow rate.	4289.43	47300	50	0.056		Below	No	No	No	3.84																2023-06-19
1183	CACHE-HO_1183_33	C(c1cccnc1)n1c2c(cn1)c(cc(c1ccccc1)n2)C(Nc1cccc(c1)C(O)=O)=O	Achiral|None|		SPR	Biacore 8K	SA	10mM HEPES pH 7.5, 150mM NaCl, 0.01% Tween 20, 2% DMSO	primary screen	LRRK2	25	40	60	60	3 injections of 50 mM NaOH for 60 sec each at 10 µL/min flow rate; 1 injection of protein for 50 sec at 10 µL/min flow rate to reach 3900-4100 RU; 1 injection of assay buffer without DMSO at 30 µL/min flow rate.	4136.96	47300	50	3.43		Above	No	Yes	Yes	-3.4																2023-06-19
1183	CACHE-HO_1183_33	C(c1cccnc1)n1c2c(cn1)c(cc(c1ccccc1)n2)C(Nc1cccc(c1)C(O)=O)=O	Achiral|None|		SPR	Biacore 8K	SA	10mM HEPES pH 7.5, 150mM NaCl, 0.01% Tween 20, 2% DMSO	primary screen	LRRK2	25	40	60	60	3 injections of 50 mM NaOH for 60 sec each at 10 µL/min flow rate; 1 injection of protein for 50 sec at 10 µL/min flow rate to reach 3900-4100 RU; 1 injection of assay buffer without DMSO at 30 µL/min flow rate.	4136.96	47300	50	2.88		Above	No	Yes	No	-0.52																2023-06-19
1183	CACHE-HO_1183_34	C(c1cccc(c1)F)n1c2c(cn1)c(cc(c1ccccc1)n2)C(Nc1cccnc1n1cncn1)=O	Achiral|None|		SPR	Biacore 8K	SA	10mM HEPES pH 7.5, 150mM NaCl, 0.01% Tween 20, 2% DMSO	primary screen	LRRK2	25	40	60	60	3 injections of 50 mM NaOH for 60 sec each at 10 µL/min flow rate; 1 injection of protein for 50 sec at 10 µL/min flow rate to reach 3900-4100 RU; 1 injection of assay buffer without DMSO at 30 µL/min flow rate.	4144.61	47300	50	0.085		Below	No	No	No	5.59																2023-06-19
1183	CACHE-HO_1183_34	C(c1cccc(c1)F)n1c2c(cn1)c(cc(c1ccccc1)n2)C(Nc1cccnc1n1cncn1)=O	Achiral|None|		SPR	Biacore 8K	SA	10mM HEPES pH 7.5, 150mM NaCl, 0.01% Tween 20, 2% DMSO	primary screen	LRRK2	25	40	60	60	3 injections of 50 mM NaOH for 60 sec each at 10 µL/min flow rate; 1 injection of protein for 50 sec at 10 µL/min flow rate to reach 3900-4100 RU; 1 injection of assay buffer without DMSO at 30 µL/min flow rate.	4144.61	47300	50	0.048		Below	No	No	No	3.46																2023-06-19
1183	CACHE-HO_1183_35	C(c1cccnc1)n1c2c(cn1)c(cc(c1ccccc1)n2)C(Nc1cccnc1n1cncn1)=O	Achiral|None|		SPR	Biacore 8K	SA	10mM HEPES pH 7.5, 150mM NaCl, 0.01% Tween 20, 2% DMSO	primary screen	LRRK2	25	40	60	60	3 injections of 50 mM NaOH for 60 sec each at 10 µL/min flow rate; 1 injection of protein for 50 sec at 10 µL/min flow rate to reach 3900-4100 RU; 1 injection of assay buffer without DMSO at 30 µL/min flow rate.	3945.48	47300	50	-0.27		Below	No	No	No	5.96																2023-06-19
1183	CACHE-HO_1183_35	C(c1cccnc1)n1c2c(cn1)c(cc(c1ccccc1)n2)C(Nc1cccnc1n1cncn1)=O	Achiral|None|		SPR	Biacore 8K	SA	10mM HEPES pH 7.5, 150mM NaCl, 0.01% Tween 20, 2% DMSO	primary screen	LRRK2	25	40	60	60	3 injections of 50 mM NaOH for 60 sec each at 10 µL/min flow rate; 1 injection of protein for 50 sec at 10 µL/min flow rate to reach 3900-4100 RU; 1 injection of assay buffer without DMSO at 30 µL/min flow rate.	3945.48	47300	50	-0.039		Below	No	No	No	3.94																2023-06-19
1183	CACHE-HO_1183_36	CS(Nc1ccccc1NC(c1cc(c2ccccc2)nc2c1cnn2Cc1cccnc1)=O)(=O)=O	Achiral|None|		SPR	Biacore 8K	SA	10mM HEPES pH 7.5, 150mM NaCl, 0.01% Tween 20, 2% DMSO	primary screen	LRRK2	25	40	60	60	3 injections of 50 mM NaOH for 60 sec each at 10 µL/min flow rate; 1 injection of protein for 50 sec at 10 µL/min flow rate to reach 3900-4100 RU; 1 injection of assay buffer without DMSO at 30 µL/min flow rate.	3945.48	47300	50	0.9		Above	No	No	No	-14.62																2023-06-19
1183	CACHE-HO_1183_36	CS(Nc1ccccc1NC(c1cc(c2ccccc2)nc2c1cnn2Cc1cccnc1)=O)(=O)=O	Achiral|None|		SPR	Biacore 8K	SA	10mM HEPES pH 7.5, 150mM NaCl, 0.01% Tween 20, 2% DMSO	primary screen	LRRK2	25	40	60	60	3 injections of 50 mM NaOH for 60 sec each at 10 µL/min flow rate; 1 injection of protein for 50 sec at 10 µL/min flow rate to reach 3900-4100 RU; 1 injection of assay buffer without DMSO at 30 µL/min flow rate.	3945.48	47300	50	1.48		Above	No	No	No	-6.99																2023-06-19
1183	CACHE-HO_1183_36	CS(Nc1ccccc1NC(c1cc(c2ccccc2)nc2c1cnn2Cc1cccnc1)=O)(=O)=O	Achiral|None|		SPR	Biacore 8K	SA	10mM HEPES pH 7.5, 150mM NaCl, 0.01% Tween 20, 2% DMSO	hit confirmation -dose response	LRRK2	25	40	60	120	3 injections of 50 mM NaOH for 60 sec each at 10 µL/min flow rate; 1 injection of protein for 50 sec at 10 µL/min flow rate to reach 4200-4600 RU; 1 injection of assay buffer without DMSO at 30 µL/min flow rate.	4248.73	47300									2.5	200	0.0001	NA	1.16	11.7	NA	Low binding signal without a dose response	3.18	1.29	1.58	0.81	25.95		45.11	2023-07-10
1183	CACHE-HO_1183_37	C(c1cccnc1)n1c2c(cn1)c(cc(c1ccccc1)n2)C(Nc1cccc(c1)c1nnco1)=O	Achiral|None|		SPR	Biacore 8K	SA	10mM HEPES pH 7.5, 150mM NaCl, 0.01% Tween 20, 2% DMSO	primary screen	LRRK2	25	40	60	60	3 injections of 50 mM NaOH for 60 sec each at 10 µL/min flow rate; 1 injection of protein for 50 sec at 10 µL/min flow rate to reach 3900-4100 RU; 1 injection of assay buffer without DMSO at 30 µL/min flow rate.	4289.43	47300	50	0.18		Below	No	No	No	6.02																2023-06-19
1183	CACHE-HO_1183_37	C(c1cccnc1)n1c2c(cn1)c(cc(c1ccccc1)n2)C(Nc1cccc(c1)c1nnco1)=O	Achiral|None|		SPR	Biacore 8K	SA	10mM HEPES pH 7.5, 150mM NaCl, 0.01% Tween 20, 2% DMSO	primary screen	LRRK2	25	40	60	60	3 injections of 50 mM NaOH for 60 sec each at 10 µL/min flow rate; 1 injection of protein for 50 sec at 10 µL/min flow rate to reach 3900-4100 RU; 1 injection of assay buffer without DMSO at 30 µL/min flow rate.	4289.43	47300	50	0.23		Below	No	No	No	4.12																2023-06-19
1183	CACHE-HO_1183_38	C(c1cccnc1)n1c2c(cn1)c(cc(c1ccccc1)n2)C(Nc1cccc2c1OCO2)=O	Achiral|None|		SPR	Biacore 8K	SA	10mM HEPES pH 7.5, 150mM NaCl, 0.01% Tween 20, 2% DMSO	primary screen	LRRK2	25	40	60	60	3 injections of 50 mM NaOH for 60 sec each at 10 µL/min flow rate; 1 injection of protein for 50 sec at 10 µL/min flow rate to reach 3900-4100 RU; 1 injection of assay buffer without DMSO at 30 µL/min flow rate.	3945.67	47300	50	0.34		Below	No	No	No	6.48																2023-06-19
1183	CACHE-HO_1183_38	C(c1cccnc1)n1c2c(cn1)c(cc(c1ccccc1)n2)C(Nc1cccc2c1OCO2)=O	Achiral|None|		SPR	Biacore 8K	SA	10mM HEPES pH 7.5, 150mM NaCl, 0.01% Tween 20, 2% DMSO	primary screen	LRRK2	25	40	60	60	3 injections of 50 mM NaOH for 60 sec each at 10 µL/min flow rate; 1 injection of protein for 50 sec at 10 µL/min flow rate to reach 3900-4100 RU; 1 injection of assay buffer without DMSO at 30 µL/min flow rate.	3945.67	47300	50	0.44		Below	No	No	No	4.73																2023-06-19
1183	CACHE-HO_1183_39	C(c1cccc(c1)F)n1c2c(cn1)c(cc(c1ccccc1)n2)C(Nc1ccncc1C#N)=O	Achiral|None|		SPR	Biacore 8K	SA	10mM HEPES pH 7.5, 150mM NaCl, 0.01% Tween 20, 2% DMSO	primary screen	LRRK2	25	40	60	60	3 injections of 50 mM NaOH for 60 sec each at 10 µL/min flow rate; 1 injection of protein for 50 sec at 10 µL/min flow rate to reach 3900-4100 RU; 1 injection of assay buffer without DMSO at 30 µL/min flow rate.	4289.43	47300	50	-0.28		Below	No	No	No	8.27																2023-06-19
1183	CACHE-HO_1183_39	C(c1cccc(c1)F)n1c2c(cn1)c(cc(c1ccccc1)n2)C(Nc1ccncc1C#N)=O	Achiral|None|		SPR	Biacore 8K	SA	10mM HEPES pH 7.5, 150mM NaCl, 0.01% Tween 20, 2% DMSO	primary screen	LRRK2	25	40	60	60	3 injections of 50 mM NaOH for 60 sec each at 10 µL/min flow rate; 1 injection of protein for 50 sec at 10 µL/min flow rate to reach 3900-4100 RU; 1 injection of assay buffer without DMSO at 30 µL/min flow rate.	4289.43	47300	50	0.14		Below	No	No	No	5.38																2023-06-19
1183	CACHE-HO_1183_4	Cc1ccc(c2cc(C(Nc3cccc(c3)C(N(C)CC(N)=O)=O)=O)c3ccccc3n2)o1	Achiral|None|		SPR	Biacore 8K	SA	10mM HEPES pH 7.5, 150mM NaCl, 0.01% Tween 20, 2% DMSO	primary screen	LRRK2	25	40	60	60	3 injections of 50 mM NaOH for 60 sec each at 10 µL/min flow rate; 1 injection of protein for 50 sec at 10 µL/min flow rate to reach 3900-4100 RU; 1 injection of assay buffer without DMSO at 30 µL/min flow rate.	4144.61	47300	50	0.46		Below	No	No	No	3.86																2023-06-19		DSF	50mM HEPES pH7.5, 150mM NaCl, 2% DMSO	-0.4	-0.5	NA	Bad curve at 500µM
1183	CACHE-HO_1183_4	Cc1ccc(c2cc(C(Nc3cccc(c3)C(N(C)CC(N)=O)=O)=O)c3ccccc3n2)o1	Achiral|None|		SPR	Biacore 8K	SA	10mM HEPES pH 7.5, 150mM NaCl, 0.01% Tween 20, 2% DMSO	primary screen	LRRK2	25	40	60	60	3 injections of 50 mM NaOH for 60 sec each at 10 µL/min flow rate; 1 injection of protein for 50 sec at 10 µL/min flow rate to reach 3900-4100 RU; 1 injection of assay buffer without DMSO at 30 µL/min flow rate.	4144.61	47300	50	0.57		Below	No	No	No	1.72																2023-06-19		DSF	50mM HEPES pH7.5, 150mM NaCl, 2% DMSO	-0.4	-0.5	NA	Bad curve at 500µM
1183	CACHE-HO_1183_4	Cc1ccc(c2cc(C(Nc3cccc(c3)C(N(C)CC(N)=O)=O)=O)c3ccccc3n2)o1	Achiral|None|		SPR	Biacore 8K	SA	10mM HEPES pH 7.5, 150mM NaCl, 0.01% Tween 20, 2% DMSO	hit confirmation -dose response	LRRK2	25	40	60	120	3 injections of 50 mM NaOH for 60 sec each at 10 µL/min flow rate; 1 injection of protein for 50 sec at 10 µL/min flow rate to reach 4200-4600 RU; 1 injection of assay buffer without DMSO at 30 µL/min flow rate.	4368.85	47300									2.5	200	0.00037	3.68E-04	8.06	49.16	17		12.51	-0.53	-2.85	0.075	119.65	41.372597	41.09	2023-07-10		DSF	50mM HEPES pH7.5, 150mM NaCl, 2% DMSO	-0.4	-0.5	NA	Bad curve at 500µM
1183	CACHE-HO_1183_40	C1CC1c1cc(C(Nc2cccc3c2nc[nH]3)=O)c2cnn(Cc3cccnc3)c2n1	Achiral|None|		SPR	Biacore 8K	SA	10mM HEPES pH 7.5, 150mM NaCl, 0.01% Tween 20, 2% DMSO	primary screen	LRRK2	25	40	60	60	3 injections of 50 mM NaOH for 60 sec each at 10 µL/min flow rate; 1 injection of protein for 50 sec at 10 µL/min flow rate to reach 3900-4100 RU; 1 injection of assay buffer without DMSO at 30 µL/min flow rate.	4102.53	47300	50	2.69		Above	No	Yes	No	8.83																2023-06-19
1183	CACHE-HO_1183_40	C1CC1c1cc(C(Nc2cccc3c2nc[nH]3)=O)c2cnn(Cc3cccnc3)c2n1	Achiral|None|		SPR	Biacore 8K	SA	10mM HEPES pH 7.5, 150mM NaCl, 0.01% Tween 20, 2% DMSO	primary screen	LRRK2	25	40	60	60	3 injections of 50 mM NaOH for 60 sec each at 10 µL/min flow rate; 1 injection of protein for 50 sec at 10 µL/min flow rate to reach 3900-4100 RU; 1 injection of assay buffer without DMSO at 30 µL/min flow rate.	4102.53	47300	50	2.87		Above	No	Yes	No	8.07																2023-06-19
1183	CACHE-HO_1183_41	COc1c(ccnn1)NC(c1cc(c2ccccc2)nc2c1cnn2Cc1cccnc1)=O	Achiral|None|		SPR	Biacore 8K	SA	10mM HEPES pH 7.5, 150mM NaCl, 0.01% Tween 20, 2% DMSO	primary screen	LRRK2	25	40	60	60	3 injections of 50 mM NaOH for 60 sec each at 10 µL/min flow rate; 1 injection of protein for 50 sec at 10 µL/min flow rate to reach 3900-4100 RU; 1 injection of assay buffer without DMSO at 30 µL/min flow rate.	4144.61	47300	50	1.26		Above	No	No	No	5.25																2023-06-19		DSF	50mM HEPES pH7.5, 150mM NaCl, 2% DMSO	-0.5	-0.2	-0.9
1183	CACHE-HO_1183_41	COc1c(ccnn1)NC(c1cc(c2ccccc2)nc2c1cnn2Cc1cccnc1)=O	Achiral|None|		SPR	Biacore 8K	SA	10mM HEPES pH 7.5, 150mM NaCl, 0.01% Tween 20, 2% DMSO	primary screen	LRRK2	25	40	60	60	3 injections of 50 mM NaOH for 60 sec each at 10 µL/min flow rate; 1 injection of protein for 50 sec at 10 µL/min flow rate to reach 3900-4100 RU; 1 injection of assay buffer without DMSO at 30 µL/min flow rate.	4144.61	47300	50	2.36		Above	No	No	No	2.08																2023-06-19		DSF	50mM HEPES pH7.5, 150mM NaCl, 2% DMSO	-0.5	-0.2	-0.9
1183	CACHE-HO_1183_41	COc1c(ccnn1)NC(c1cc(c2ccccc2)nc2c1cnn2Cc1cccnc1)=O	Achiral|None|		SPR	Biacore 8K	SA	10mM HEPES pH 7.5, 150mM NaCl, 0.01% Tween 20, 2% DMSO	hit confirmation -dose response	LRRK2	25	40	60	120	3 injections of 50 mM NaOH for 60 sec each at 10 µL/min flow rate; 1 injection of protein for 50 sec at 10 µL/min flow rate to reach 4200-4600 RU; 1 injection of assay buffer without DMSO at 30 µL/min flow rate.	4368.85	47300									2.5	200	4.4E-5	4.39E-05	3.37	44.97	34.5		13.95	-1.06	-0.55	2.95	110.71	84.93353	40.62	2023-07-10		DSF	50mM HEPES pH7.5, 150mM NaCl, 2% DMSO	-0.5	-0.2	-0.9
1183	CACHE-HO_1183_42	Cc1ccc(c(n1)O)NC(c1cc(c2ccccc2)nc2c1cnn2Cc1cccnc1)=O	Achiral|None|		SPR	Biacore 8K	SA	10mM HEPES pH 7.5, 150mM NaCl, 0.01% Tween 20, 2% DMSO	primary screen	LRRK2	25	40	60	60	3 injections of 50 mM NaOH for 60 sec each at 10 µL/min flow rate; 1 injection of protein for 50 sec at 10 µL/min flow rate to reach 3900-4100 RU; 1 injection of assay buffer without DMSO at 30 µL/min flow rate.	3945.67	47300	50	-0.17		Below	No	No	No	5.87																2023-06-19
1183	CACHE-HO_1183_42	Cc1ccc(c(n1)O)NC(c1cc(c2ccccc2)nc2c1cnn2Cc1cccnc1)=O	Achiral|None|		SPR	Biacore 8K	SA	10mM HEPES pH 7.5, 150mM NaCl, 0.01% Tween 20, 2% DMSO	primary screen	LRRK2	25	40	60	60	3 injections of 50 mM NaOH for 60 sec each at 10 µL/min flow rate; 1 injection of protein for 50 sec at 10 µL/min flow rate to reach 3900-4100 RU; 1 injection of assay buffer without DMSO at 30 µL/min flow rate.	3945.67	47300	50	0.019		Below	No	No	No	5.1																2023-06-19
1183	CACHE-HO_1183_43	C(c1cnc(nc1O)O)NC(c1cc(c2ccccc2)nc2c1cnn2Cc1ccco1)=O	Achiral|None|		SPR	Biacore 8K	SA	10mM HEPES pH 7.5, 150mM NaCl, 0.01% Tween 20, 2% DMSO	primary screen	LRRK2	25	40	60	60	3 injections of 50 mM NaOH for 60 sec each at 10 µL/min flow rate; 1 injection of protein for 50 sec at 10 µL/min flow rate to reach 3900-4100 RU; 1 injection of assay buffer without DMSO at 30 µL/min flow rate.	4144.61	47300	50	0.061		Below	No	No	No	4.87																2023-06-19
1183	CACHE-HO_1183_43	C(c1cnc(nc1O)O)NC(c1cc(c2ccccc2)nc2c1cnn2Cc1ccco1)=O	Achiral|None|		SPR	Biacore 8K	SA	10mM HEPES pH 7.5, 150mM NaCl, 0.01% Tween 20, 2% DMSO	primary screen	LRRK2	25	40	60	60	3 injections of 50 mM NaOH for 60 sec each at 10 µL/min flow rate; 1 injection of protein for 50 sec at 10 µL/min flow rate to reach 3900-4100 RU; 1 injection of assay buffer without DMSO at 30 µL/min flow rate.	4144.61	47300	50	0.083		Below	No	No	No	3.68																2023-06-19
1183	CACHE-HO_1183_44	C(c1cccnc1)n1c2c(cn1)c(cc(c1ccccc1)n2)C(Nc1ccc(C#N)c(c1)F)=O	Achiral|None|		SPR	Biacore 8K	SA	10mM HEPES pH 7.5, 150mM NaCl, 0.01% Tween 20, 2% DMSO	primary screen	LRRK2	25	40	60	60	3 injections of 50 mM NaOH for 60 sec each at 10 µL/min flow rate; 1 injection of protein for 50 sec at 10 µL/min flow rate to reach 3900-4100 RU; 1 injection of assay buffer without DMSO at 30 µL/min flow rate.	4144.61	47300	50	0.17		Below	No	No	No	6.22																2023-06-19
1183	CACHE-HO_1183_44	C(c1cccnc1)n1c2c(cn1)c(cc(c1ccccc1)n2)C(Nc1ccc(C#N)c(c1)F)=O	Achiral|None|		SPR	Biacore 8K	SA	10mM HEPES pH 7.5, 150mM NaCl, 0.01% Tween 20, 2% DMSO	primary screen	LRRK2	25	40	60	60	3 injections of 50 mM NaOH for 60 sec each at 10 µL/min flow rate; 1 injection of protein for 50 sec at 10 µL/min flow rate to reach 3900-4100 RU; 1 injection of assay buffer without DMSO at 30 µL/min flow rate.	4144.61	47300	50	0.2		Below	No	No	No	5.11																2023-06-19
1183	CACHE-HO_1183_45	C(c1cccnc1)n1c2c(cn1)c(cc(c1cccnc1)n2)C(Nc1ccccc1C(N)=O)=O	Achiral|None|		SPR	Biacore 8K	SA	10mM HEPES pH 7.5, 150mM NaCl, 0.01% Tween 20, 2% DMSO	primary screen	LRRK2	25	40	60	60	3 injections of 50 mM NaOH for 60 sec each at 10 µL/min flow rate; 1 injection of protein for 50 sec at 10 µL/min flow rate to reach 3900-4100 RU; 1 injection of assay buffer without DMSO at 30 µL/min flow rate.	3945.48	47300	50	0.14		Below	No	No	No	18.3																2023-06-19
1183	CACHE-HO_1183_45	C(c1cccnc1)n1c2c(cn1)c(cc(c1cccnc1)n2)C(Nc1ccccc1C(N)=O)=O	Achiral|None|		SPR	Biacore 8K	SA	10mM HEPES pH 7.5, 150mM NaCl, 0.01% Tween 20, 2% DMSO	primary screen	LRRK2	25	40	60	60	3 injections of 50 mM NaOH for 60 sec each at 10 µL/min flow rate; 1 injection of protein for 50 sec at 10 µL/min flow rate to reach 3900-4100 RU; 1 injection of assay buffer without DMSO at 30 µL/min flow rate.	3945.48	47300	50	0.57		Below	No	Yes	No	8.86																2023-06-19
1183	CACHE-HO_1183_46	C(c1c[nH]cn1)NC(c1cc(c2ccccc2)nc2c1cnn2Cc1cccnc1)=O	Achiral|None|		SPR	Biacore 8K	SA	10mM HEPES pH 7.5, 150mM NaCl, 0.01% Tween 20, 2% DMSO	primary screen	LRRK2	25	40	60	60	3 injections of 50 mM NaOH for 60 sec each at 10 µL/min flow rate; 1 injection of protein for 50 sec at 10 µL/min flow rate to reach 3900-4100 RU; 1 injection of assay buffer without DMSO at 30 µL/min flow rate.	4166.66	47300	50	1.57		Above	No	No	No	5.42																2023-06-19		DSF	50mM HEPES pH7.5, 150mM NaCl, 2% DMSO	0.6	-0.3	-0.3
1183	CACHE-HO_1183_46	C(c1c[nH]cn1)NC(c1cc(c2ccccc2)nc2c1cnn2Cc1cccnc1)=O	Achiral|None|		SPR	Biacore 8K	SA	10mM HEPES pH 7.5, 150mM NaCl, 0.01% Tween 20, 2% DMSO	primary screen	LRRK2	25	40	60	60	3 injections of 50 mM NaOH for 60 sec each at 10 µL/min flow rate; 1 injection of protein for 50 sec at 10 µL/min flow rate to reach 3900-4100 RU; 1 injection of assay buffer without DMSO at 30 µL/min flow rate.	4166.66	47300	50	2.06		Above	No	No	No	4.18																2023-06-19		DSF	50mM HEPES pH7.5, 150mM NaCl, 2% DMSO	0.6	-0.3	-0.3
1183	CACHE-HO_1183_46	C(c1c[nH]cn1)NC(c1cc(c2ccccc2)nc2c1cnn2Cc1cccnc1)=O	Achiral|None|		SPR	Biacore 8K	SA	10mM HEPES pH 7.5, 150mM NaCl, 0.01% Tween 20, 2% DMSO	hit confirmation -dose response	LRRK2	25	40	60	120	3 injections of 50 mM NaOH for 60 sec each at 10 µL/min flow rate; 1 injection of protein for 50 sec at 10 µL/min flow rate to reach 4200-4600 RU; 1 injection of assay buffer without DMSO at 30 µL/min flow rate.	4513.39	47300									2.5	200	4.1E-5	4.12E-05	1.33	35.98	27.9		5.63	-1.36	-0.34	12.5	91.61	71.028513	39.28	2023-07-10		DSF	50mM HEPES pH7.5, 150mM NaCl, 2% DMSO	0.6	-0.3	-0.3
1183	CACHE-HO_1183_47	Cc1c(CNC(c2cc(c3ccccc3)nc3c2cnn3Cc2cccnc2)=O)nc[nH]1	Achiral|None|		SPR	Biacore 8K	SA	10mM HEPES pH 7.5, 150mM NaCl, 0.01% Tween 20, 2% DMSO	primary screen	LRRK2	25	40	60	60	3 injections of 50 mM NaOH for 60 sec each at 10 µL/min flow rate; 1 injection of protein for 50 sec at 10 µL/min flow rate to reach 3900-4100 RU; 1 injection of assay buffer without DMSO at 30 µL/min flow rate.	4166.66	47300	50	1.66		Above	No	No	No	4.84																2023-06-19		DSF	50mM HEPES pH7.5, 150mM NaCl, 2% DMSO	0.4	-0.3	-0.2
1183	CACHE-HO_1183_47	Cc1c(CNC(c2cc(c3ccccc3)nc3c2cnn3Cc2cccnc2)=O)nc[nH]1	Achiral|None|		SPR	Biacore 8K	SA	10mM HEPES pH 7.5, 150mM NaCl, 0.01% Tween 20, 2% DMSO	primary screen	LRRK2	25	40	60	60	3 injections of 50 mM NaOH for 60 sec each at 10 µL/min flow rate; 1 injection of protein for 50 sec at 10 µL/min flow rate to reach 3900-4100 RU; 1 injection of assay buffer without DMSO at 30 µL/min flow rate.	4166.66	47300	50	2.25		Above	No	No	No	3.75																2023-06-19		DSF	50mM HEPES pH7.5, 150mM NaCl, 2% DMSO	0.4	-0.3	-0.2
1183	CACHE-HO_1183_47	Cc1c(CNC(c2cc(c3ccccc3)nc3c2cnn3Cc2cccnc2)=O)nc[nH]1	Achiral|None|		SPR	Biacore 8K	SA	10mM HEPES pH 7.5, 150mM NaCl, 0.01% Tween 20, 2% DMSO	hit confirmation -dose response	LRRK2	25	40	60	120	3 injections of 50 mM NaOH for 60 sec each at 10 µL/min flow rate; 1 injection of protein for 50 sec at 10 µL/min flow rate to reach 4200-4600 RU; 1 injection of assay buffer without DMSO at 30 µL/min flow rate.	4506	47300									2.5	200	3.4E-5	3.44E-05	1.39	38.78	32.4		6.23	-2.14	-0.47	14.23	95.62	79.901356	40.55	2023-07-10		DSF	50mM HEPES pH7.5, 150mM NaCl, 2% DMSO	0.4	-0.3	-0.2
1183	CACHE-HO_1183_48	Cc1conc1NC(c1cc(c2ccccc2)nc2c1cnn2Cc1cccnc1)=O	Achiral|None|		SPR	Biacore 8K	SA	10mM HEPES pH 7.5, 150mM NaCl, 0.01% Tween 20, 2% DMSO	primary screen	LRRK2	25	40	60	60	3 injections of 50 mM NaOH for 60 sec each at 10 µL/min flow rate; 1 injection of protein for 50 sec at 10 µL/min flow rate to reach 3900-4100 RU; 1 injection of assay buffer without DMSO at 30 µL/min flow rate.	4062.55	47300	50	0.25		Below	No	No	No	5.79																2023-06-19
1183	CACHE-HO_1183_48	Cc1conc1NC(c1cc(c2ccccc2)nc2c1cnn2Cc1cccnc1)=O	Achiral|None|		SPR	Biacore 8K	SA	10mM HEPES pH 7.5, 150mM NaCl, 0.01% Tween 20, 2% DMSO	primary screen	LRRK2	25	40	60	60	3 injections of 50 mM NaOH for 60 sec each at 10 µL/min flow rate; 1 injection of protein for 50 sec at 10 µL/min flow rate to reach 3900-4100 RU; 1 injection of assay buffer without DMSO at 30 µL/min flow rate.	4062.55	47300	50	0.4		Below	No	No	No	4.04																2023-06-19
1183	CACHE-HO_1183_5	Cc1cnc(NC(c2cc(c3ccccc3)nc3c2cnn3Cc2cccnc2)=O)s1	Achiral|None|		SPR	Biacore 8K	SA	10mM HEPES pH 7.5, 150mM NaCl, 0.01% Tween 20, 2% DMSO	primary screen	LRRK2	25	40	60	60	3 injections of 50 mM NaOH for 60 sec each at 10 µL/min flow rate; 1 injection of protein for 50 sec at 10 µL/min flow rate to reach 3900-4100 RU; 1 injection of assay buffer without DMSO at 30 µL/min flow rate.	4102.53	47300	50	0.092		Below	No	No	No	5.16																2023-06-19
1183	CACHE-HO_1183_5	Cc1cnc(NC(c2cc(c3ccccc3)nc3c2cnn3Cc2cccnc2)=O)s1	Achiral|None|		SPR	Biacore 8K	SA	10mM HEPES pH 7.5, 150mM NaCl, 0.01% Tween 20, 2% DMSO	primary screen	LRRK2	25	40	60	60	3 injections of 50 mM NaOH for 60 sec each at 10 µL/min flow rate; 1 injection of protein for 50 sec at 10 µL/min flow rate to reach 3900-4100 RU; 1 injection of assay buffer without DMSO at 30 µL/min flow rate.	4102.53	47300	50	-0.0016		Below	No	No	No	2.88																2023-06-19
1183	CACHE-HO_1183_6	C(c1cccnc1)n1c2c(cn1)c(cc(c1ccccc1)n2)C(Nc1ccc(C#N)nc1)=O	Achiral|None|		SPR	Biacore 8K	SA	10mM HEPES pH 7.5, 150mM NaCl, 0.01% Tween 20, 2% DMSO	primary screen	LRRK2	25	40	60	60	3 injections of 50 mM NaOH for 60 sec each at 10 µL/min flow rate; 1 injection of protein for 50 sec at 10 µL/min flow rate to reach 3900-4100 RU; 1 injection of assay buffer without DMSO at 30 µL/min flow rate.	4144.61	47300	50	0.061		Below	No	No	No	5.84																2023-06-19
1183	CACHE-HO_1183_6	C(c1cccnc1)n1c2c(cn1)c(cc(c1ccccc1)n2)C(Nc1ccc(C#N)nc1)=O	Achiral|None|		SPR	Biacore 8K	SA	10mM HEPES pH 7.5, 150mM NaCl, 0.01% Tween 20, 2% DMSO	primary screen	LRRK2	25	40	60	60	3 injections of 50 mM NaOH for 60 sec each at 10 µL/min flow rate; 1 injection of protein for 50 sec at 10 µL/min flow rate to reach 3900-4100 RU; 1 injection of assay buffer without DMSO at 30 µL/min flow rate.	4144.61	47300	50	0.045		Below	No	No	No	2.81																2023-06-19
1183	CACHE-HO_1183_7	C(c1cccnc1)n1c2c(cn1)c(cc(c1ccccc1)n2)C(Nc1nnc(c2ccccn2)s1)=O	Achiral|None|		SPR	Biacore 8K	SA	10mM HEPES pH 7.5, 150mM NaCl, 0.01% Tween 20, 2% DMSO	primary screen	LRRK2	25	40	60	60	3 injections of 50 mM NaOH for 60 sec each at 10 µL/min flow rate; 1 injection of protein for 50 sec at 10 µL/min flow rate to reach 3900-4100 RU; 1 injection of assay buffer without DMSO at 30 µL/min flow rate.	4144.61	47300	50	0.17		Below	No	No	No	5.56																2023-06-19
1183	CACHE-HO_1183_7	C(c1cccnc1)n1c2c(cn1)c(cc(c1ccccc1)n2)C(Nc1nnc(c2ccccn2)s1)=O	Achiral|None|		SPR	Biacore 8K	SA	10mM HEPES pH 7.5, 150mM NaCl, 0.01% Tween 20, 2% DMSO	primary screen	LRRK2	25	40	60	60	3 injections of 50 mM NaOH for 60 sec each at 10 µL/min flow rate; 1 injection of protein for 50 sec at 10 µL/min flow rate to reach 3900-4100 RU; 1 injection of assay buffer without DMSO at 30 µL/min flow rate.	4144.61	47300	50	0.16		Below	No	No	No	3.54																2023-06-19
1183	CACHE-HO_1183_8	C(c1cccnc1)n1c2c(cn1)c(cc(c1ccccc1)n2)C(Nc1cccc(CS(N)(=O)=O)c1)=O	Achiral|None|		SPR	Biacore 8K	SA	10mM HEPES pH 7.5, 150mM NaCl, 0.01% Tween 20, 2% DMSO	primary screen	LRRK2	25	40	60	60	3 injections of 50 mM NaOH for 60 sec each at 10 µL/min flow rate; 1 injection of protein for 50 sec at 10 µL/min flow rate to reach 3900-4100 RU; 1 injection of assay buffer without DMSO at 30 µL/min flow rate.	4289.43	47300	50	-0.017		Below	No	No	No	6.37																2023-06-19
1183	CACHE-HO_1183_8	C(c1cccnc1)n1c2c(cn1)c(cc(c1ccccc1)n2)C(Nc1cccc(CS(N)(=O)=O)c1)=O	Achiral|None|		SPR	Biacore 8K	SA	10mM HEPES pH 7.5, 150mM NaCl, 0.01% Tween 20, 2% DMSO	primary screen	LRRK2	25	40	60	60	3 injections of 50 mM NaOH for 60 sec each at 10 µL/min flow rate; 1 injection of protein for 50 sec at 10 µL/min flow rate to reach 3900-4100 RU; 1 injection of assay buffer without DMSO at 30 µL/min flow rate.	4289.43	47300	50	0.11		Below	No	No	No	4.48																2023-06-19
1183	CACHE-HO_1183_9	C1CN(C(N1)=O)c1cccc(c1)NC(c1cc(c2ccccc2)nc2c1cnn2Cc1cccnc1)=O	Achiral|None|		SPR	Biacore 8K	SA	10mM HEPES pH 7.5, 150mM NaCl, 0.01% Tween 20, 2% DMSO	primary screen	LRRK2	25	40	60	60	3 injections of 50 mM NaOH for 60 sec each at 10 µL/min flow rate; 1 injection of protein for 50 sec at 10 µL/min flow rate to reach 3900-4100 RU; 1 injection of assay buffer without DMSO at 30 µL/min flow rate.	4144.61	47300	50	0.13		Below	No	No	No	5.01																2023-06-19
1183	CACHE-HO_1183_9	C1CN(C(N1)=O)c1cccc(c1)NC(c1cc(c2ccccc2)nc2c1cnn2Cc1cccnc1)=O	Achiral|None|		SPR	Biacore 8K	SA	10mM HEPES pH 7.5, 150mM NaCl, 0.01% Tween 20, 2% DMSO	primary screen	LRRK2	25	40	60	60	3 injections of 50 mM NaOH for 60 sec each at 10 µL/min flow rate; 1 injection of protein for 50 sec at 10 µL/min flow rate to reach 3900-4100 RU; 1 injection of assay buffer without DMSO at 30 µL/min flow rate.	4144.61	47300	50	0.13		Below	No	No	No	3.46																2023-06-19
[truncated: 14 more columns]

## Sheet: Sheet1
CACHE_1183_1
CACHE_1183_10
CACHE_1183_11
CACHE_1183_12
CACHE_1183_13
CACHE_1183_14
CACHE_1183_15
CACHE_1183_16
CACHE_1183_17
CACHE_1183_18
CACHE_1183_19
CACHE_1183_2
CACHE_1183_20
CACHE_1183_21
CACHE_1183_22
CACHE_1183_23
CACHE_1183_24
CACHE_1183_25
CACHE_1183_26
CACHE_1183_27
CACHE_1183_28
CACHE_1183_29
CACHE_1183_3
CACHE_1183_30
CACHE_1183_31
CACHE_1183_32
CACHE_1183_33
CACHE_1183_34
CACHE_1183_35
CACHE_1183_36
CACHE_1183_37
CACHE_1183_4
CACHE_1183_5
CACHE_1183_6
CACHE_1183_7
CACHE_1183_8
CACHE_1183_9
CACHE-HO_1183_1
CACHE-HO_1183_10
CACHE-HO_1183_11
CACHE-HO_1183_12
CACHE-HO_1183_13
CACHE-HO_1183_14
CACHE-HO_1183_16
CACHE-HO_1183_17
CACHE-HO_1183_18
CACHE-HO_1183_19
CACHE-HO_1183_2
CACHE-HO_1183_20
CACHE-HO_1183_21
CACHE-HO_1183_22
CACHE-HO_1183_23
CACHE-HO_1183_24
CACHE-HO_1183_25
CACHE-HO_1183_26
CACHE-HO_1183_27
CACHE-HO_1183_28
CACHE-HO_1183_29
CACHE-HO_1183_3
CACHE-HO_1183_30
CACHE-HO_1183_31
CACHE-HO_1183_32
CACHE-HO_1183_33
CACHE-HO_1183_34
CACHE-HO_1183_35
CACHE-HO_1183_36
CACHE-HO_1183_37
CACHE-HO_1183_38
CACHE-HO_1183_39
CACHE-HO_1183_4
CACHE-HO_1183_40
CACHE-HO_1183_41
CACHE-HO_1183_42
CACHE-HO_1183_43
CACHE-HO_1183_44
CACHE-HO_1183_45
CACHE-HO_1183_46
CACHE-HO_1183_47
CACHE-HO_1183_48
CACHE-HO_1183_5
CACHE-HO_1183_6
CACHE-HO_1183_7
CACHE-HO_1183_8
CACHE-HO_1183_9
